# Supplementary material for: The First Convergent Synthesis of 23,23-Difluoro-25-hydroxyvitamin D3 and Its 24-Hydroxy Derivatives: Preliminary Assessment of Biological Activities
Source: MDPI journal article supplement (doi:10.3390/molecules27165352), 2022-08-22

# The First Convergent Synthesis of 23,23-Difluoro-25-hydroxyvitamin D<sub>3</sub> and Its 24-Hydroxy Derivatives: Preliminary Assessment of Biological Activities

Sayuri Mototani <sup>1</sup>, Fumihiro Kawagoe <sup>1</sup>, Kaori Yasuda <sup>2</sup>, Hiroki Mano <sup>2</sup>, Toshiyuki Sakaki <sup>2</sup> and Atsushi Kittaka <sup>1,\*</sup>

<sup>1</sup> Faculty of Pharmaceutical Sciences, Teikyo University, 2-11-1 Kaga, Itabashi, Tokyo 173-8605, Japan

<sup>2</sup> Faculty of Engineering, Toyama Prefectural University, Imizu, Toyama 939-0398, Japan

\* Correspondence: akittaka@pharm.teikyo-u.ac.jp; Tel.: +81-3-3964-8109; Fax: +81-3-3964-8117

## Contents

|                                                                                                                                                                                                                                                 |         |
|-------------------------------------------------------------------------------------------------------------------------------------------------------------------------------------------------------------------------------------------------|---------|
| Title page                                                                                                                                                                                                                                      | S1      |
| <sup>1</sup> H and <sup>13</sup> C-NMR spectra of all new compounds <b>20</b> , <b>13</b> , <b>23</b> , <b>24</b> , <b>9</b> , <b>26</b> , <b>28–30</b> , <b>10</b> , <b>11</b> , <b>32–36</b> , <b>5</b> , <b>7</b> , and <b>8</b> .<br>S2-S20 |         |
| <sup>19</sup> F-NMR spectra of <b>5</b> , <b>7</b> , and <b>8</b> .                                                                                                                                                                             | S21-S22 |

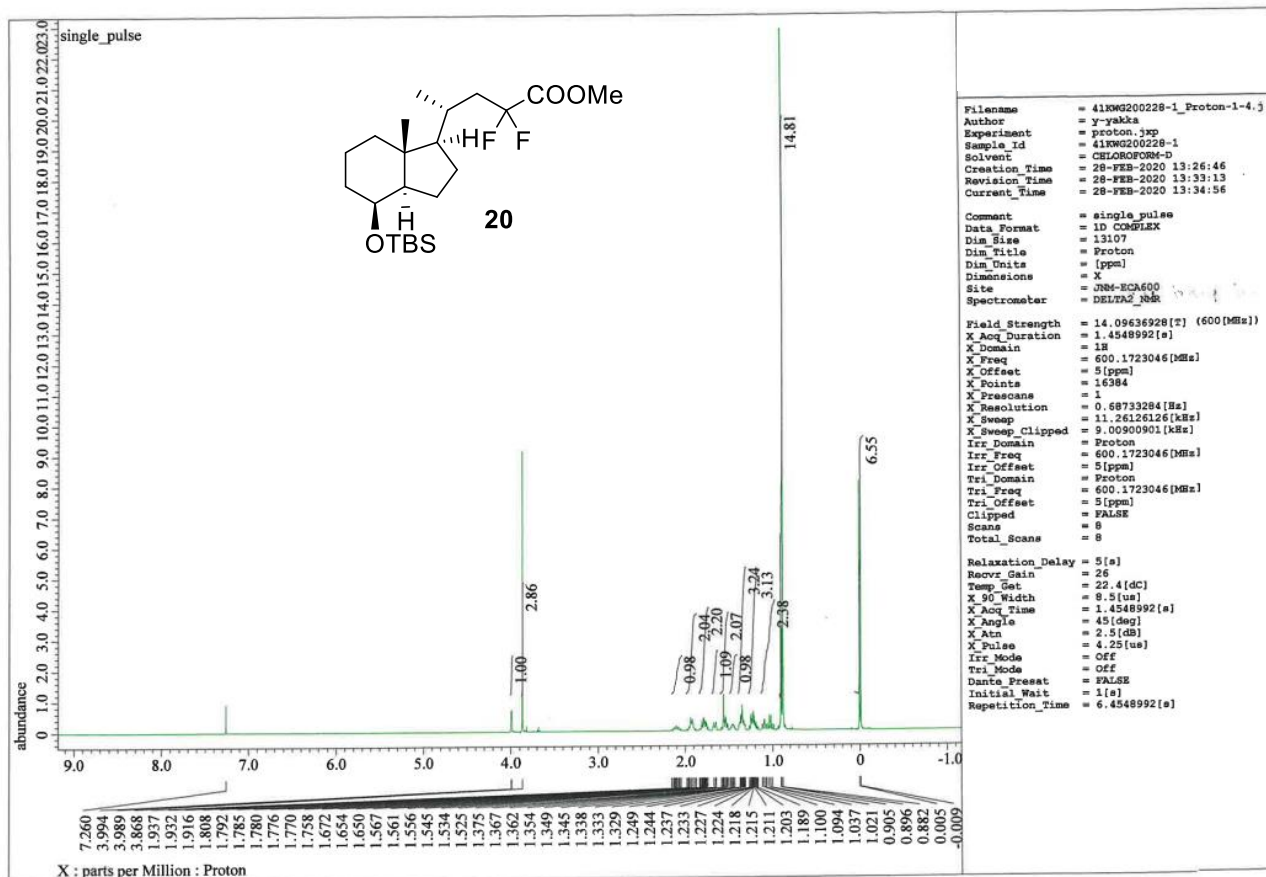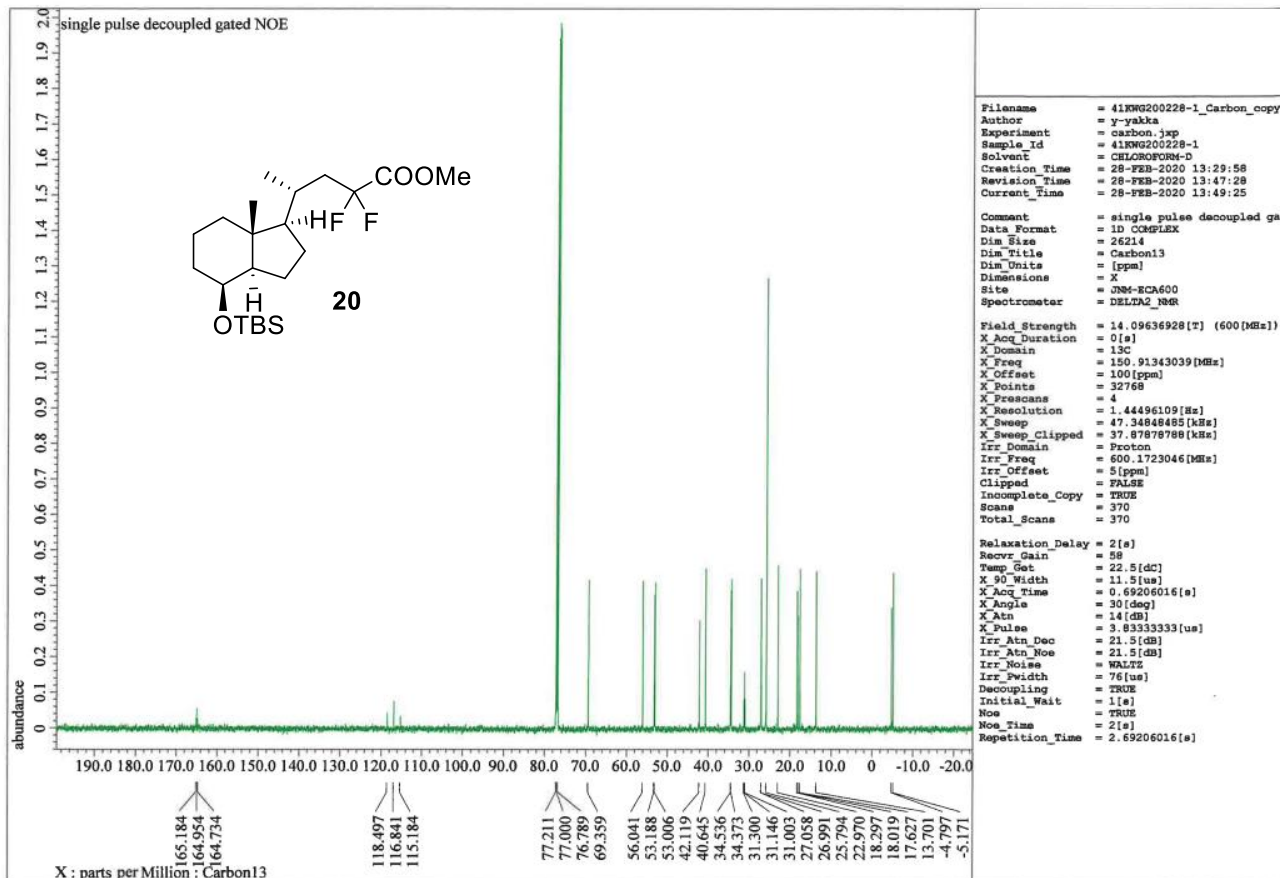

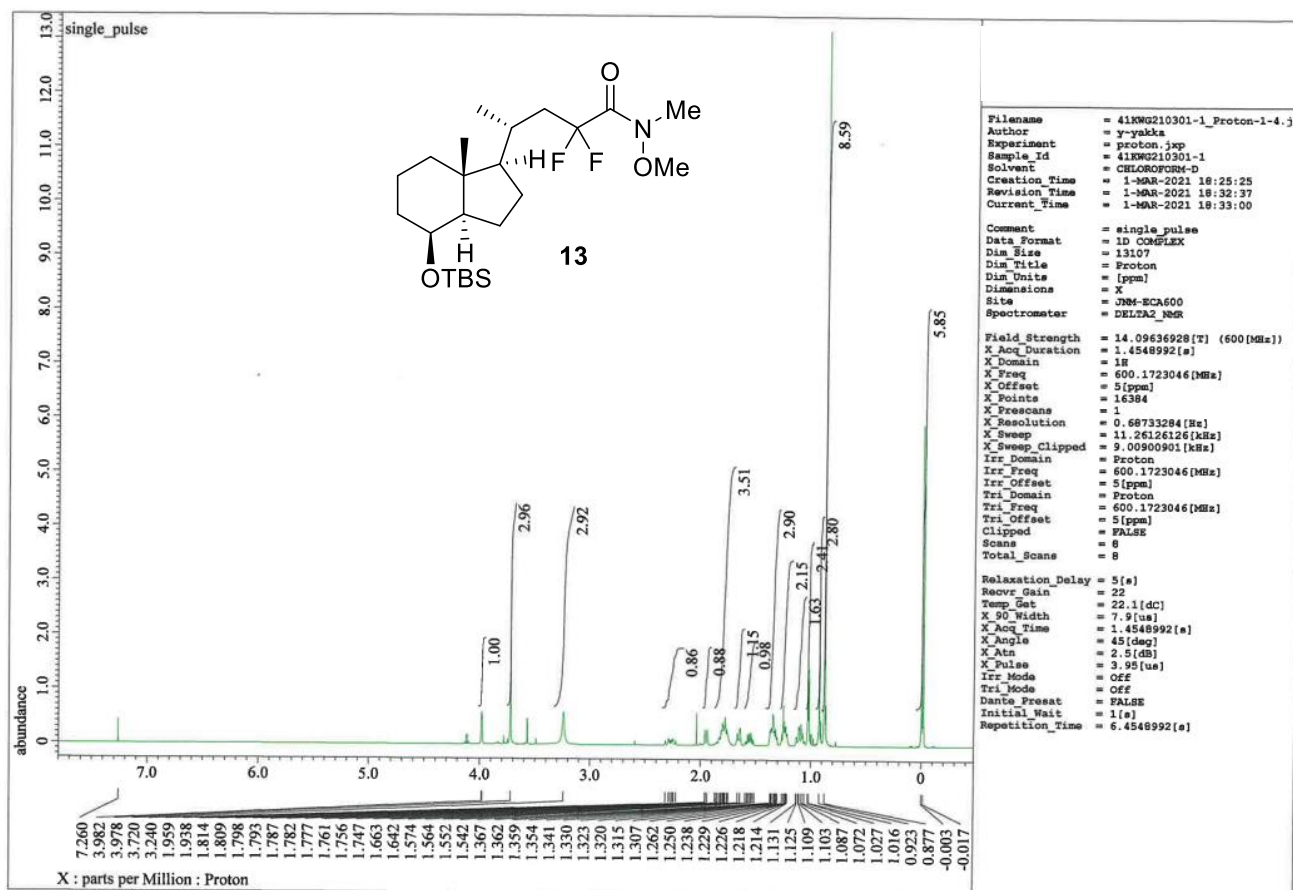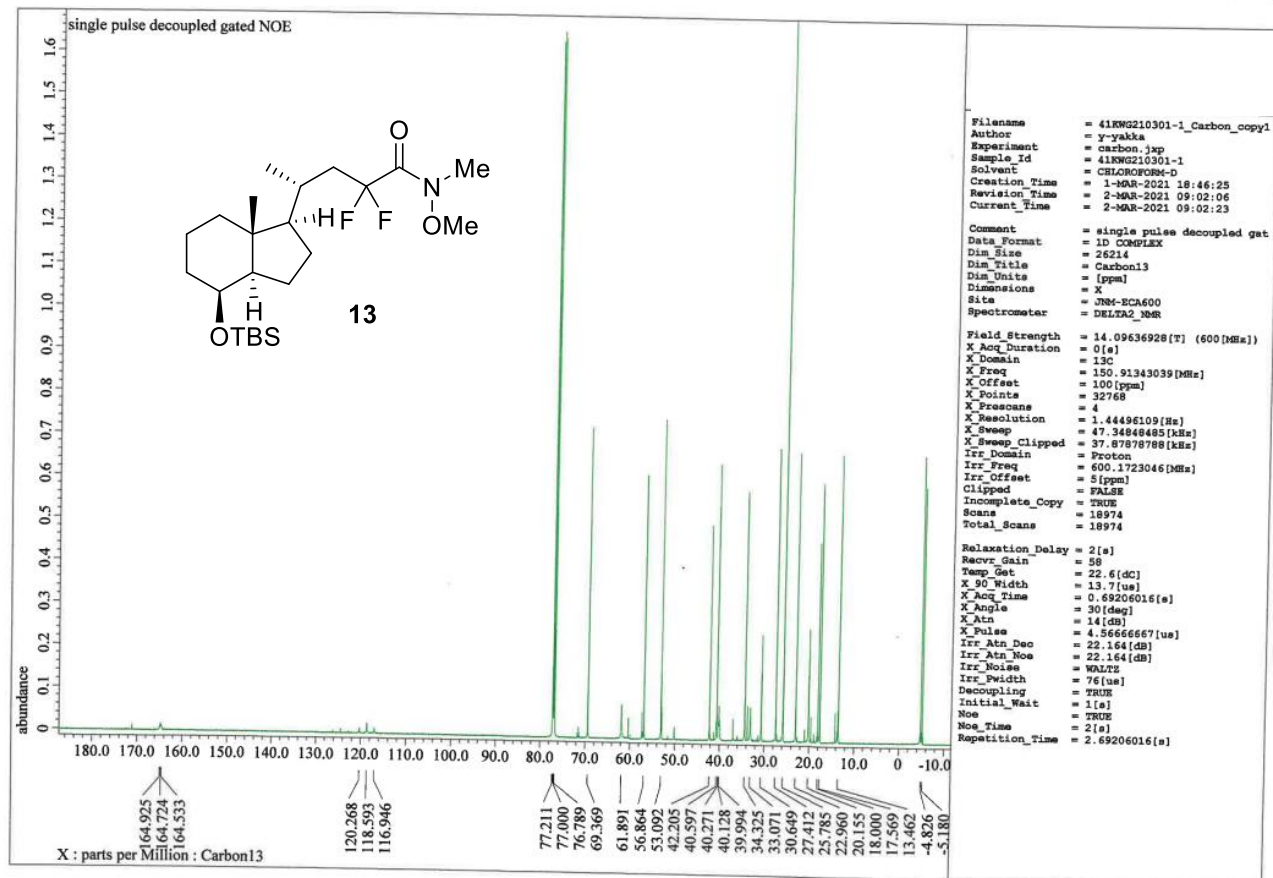





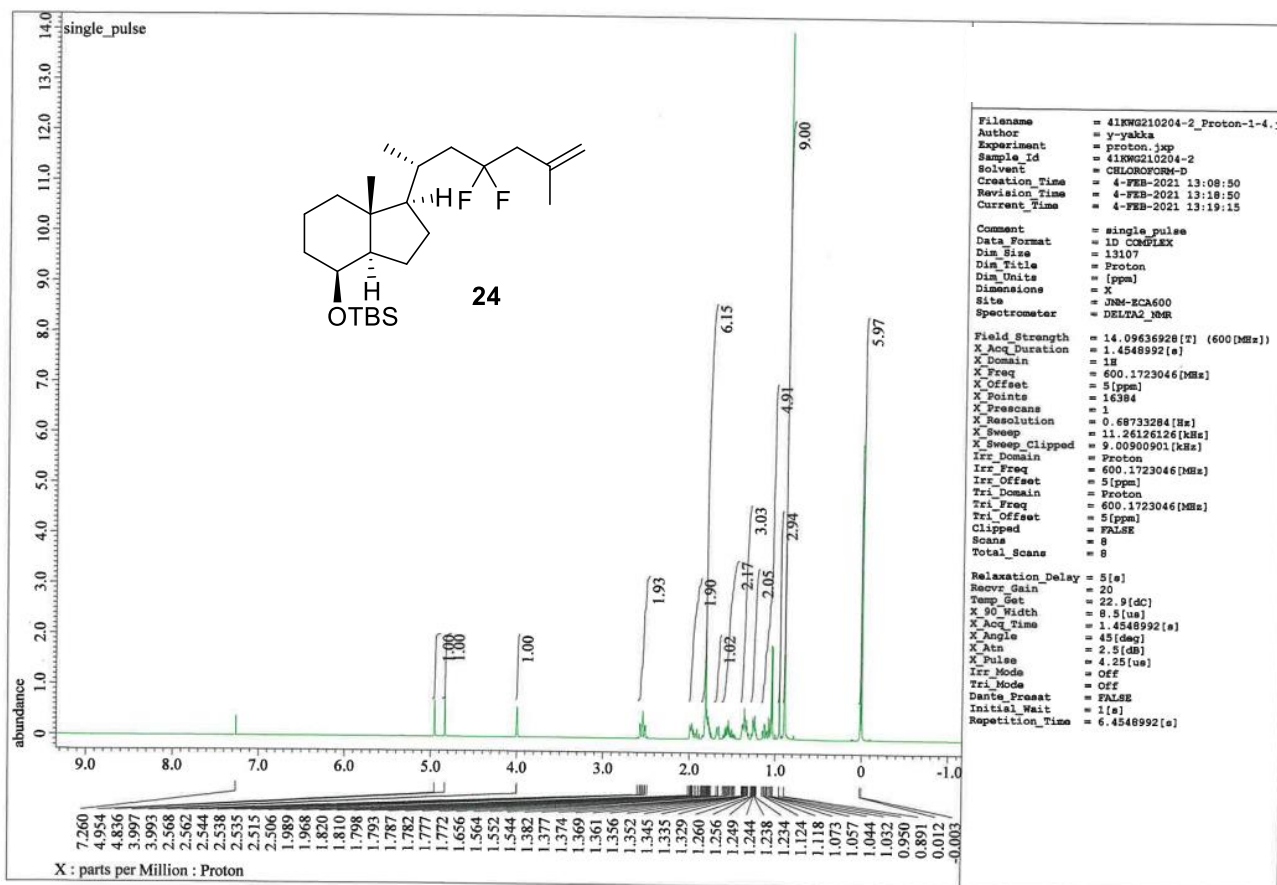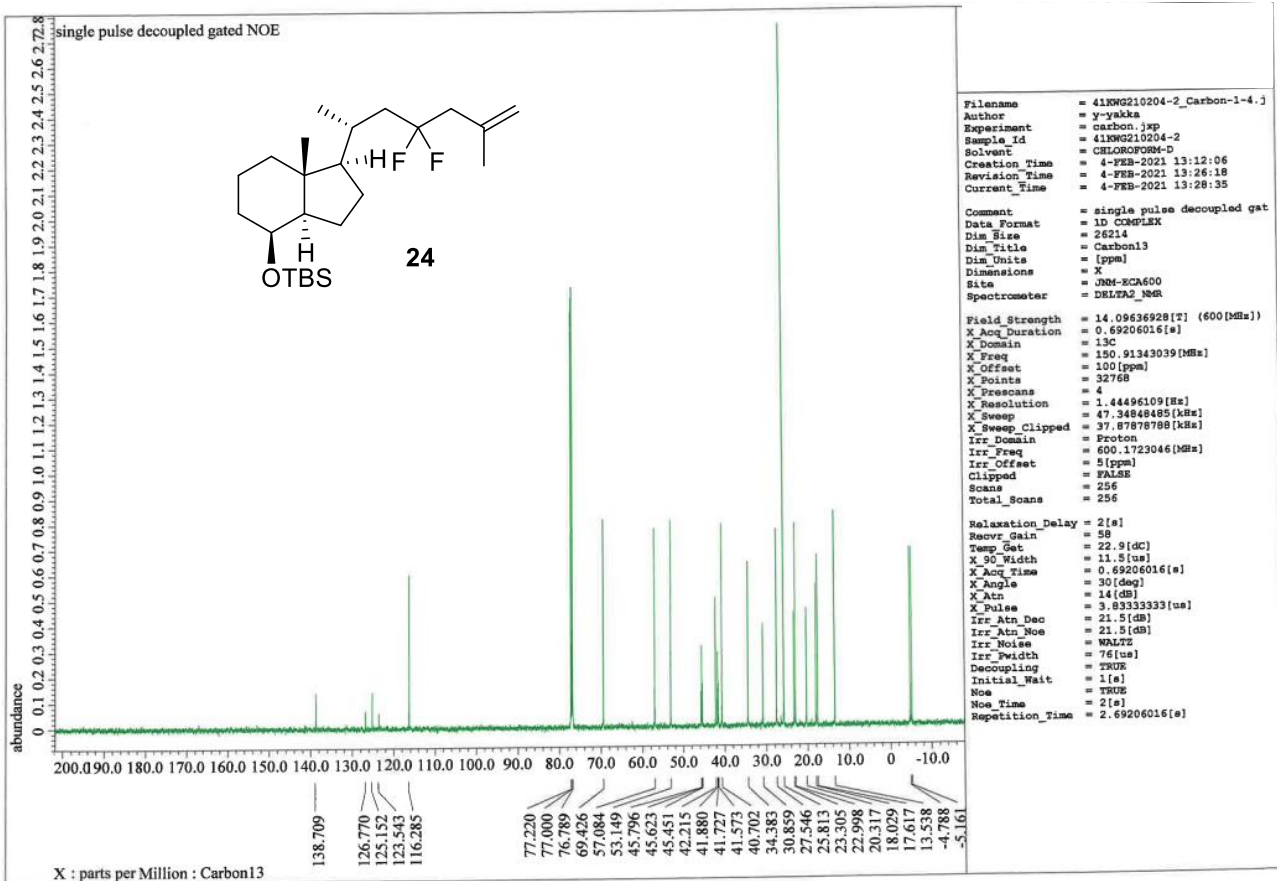







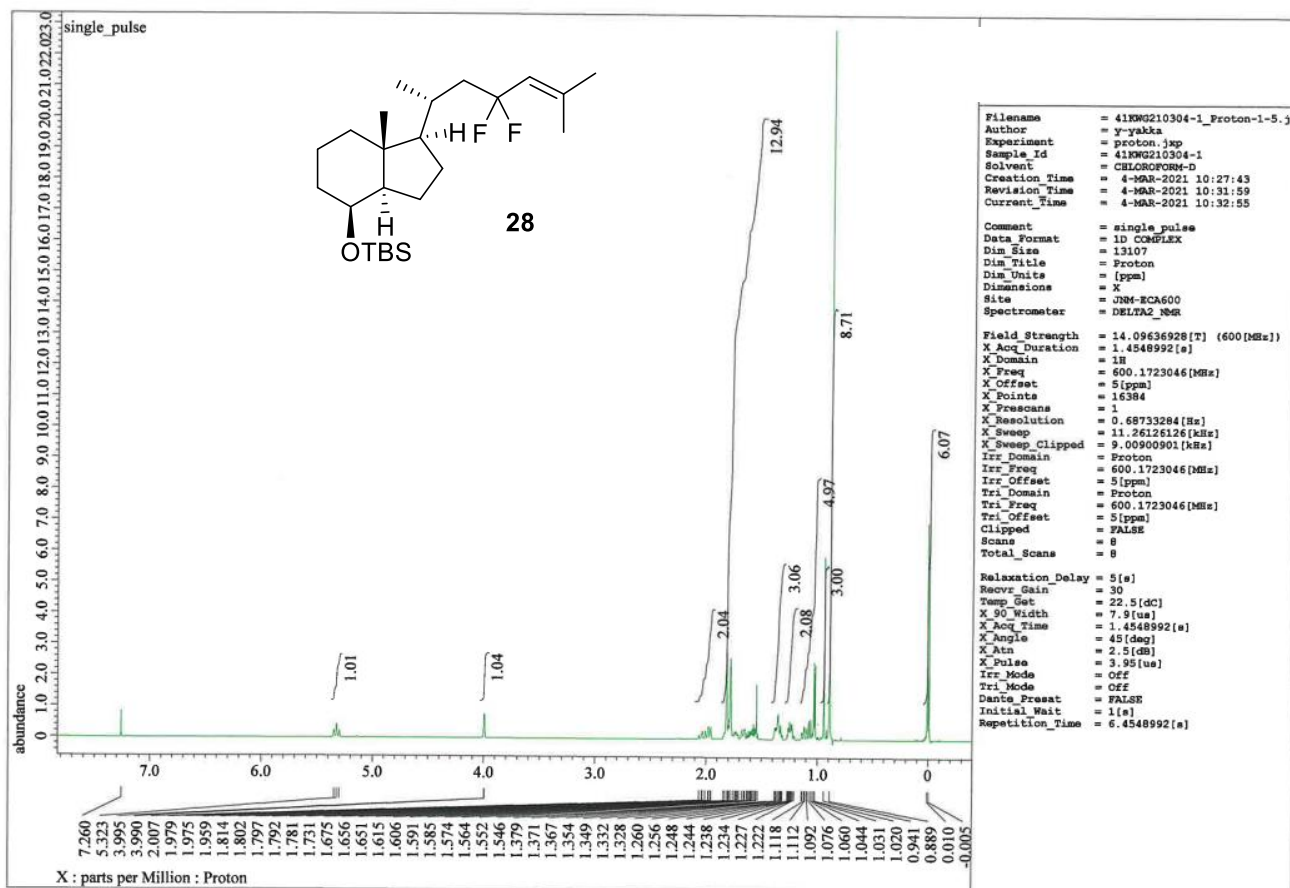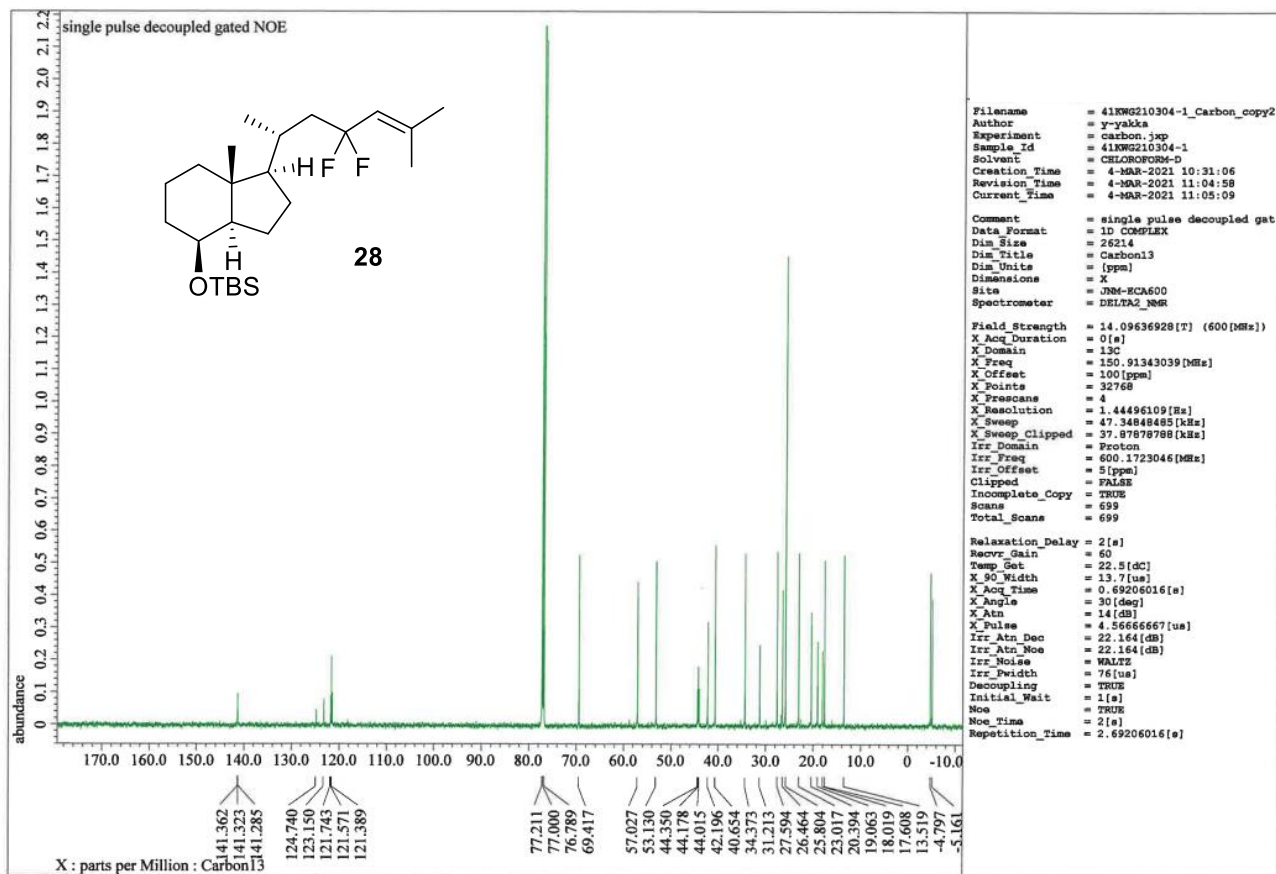



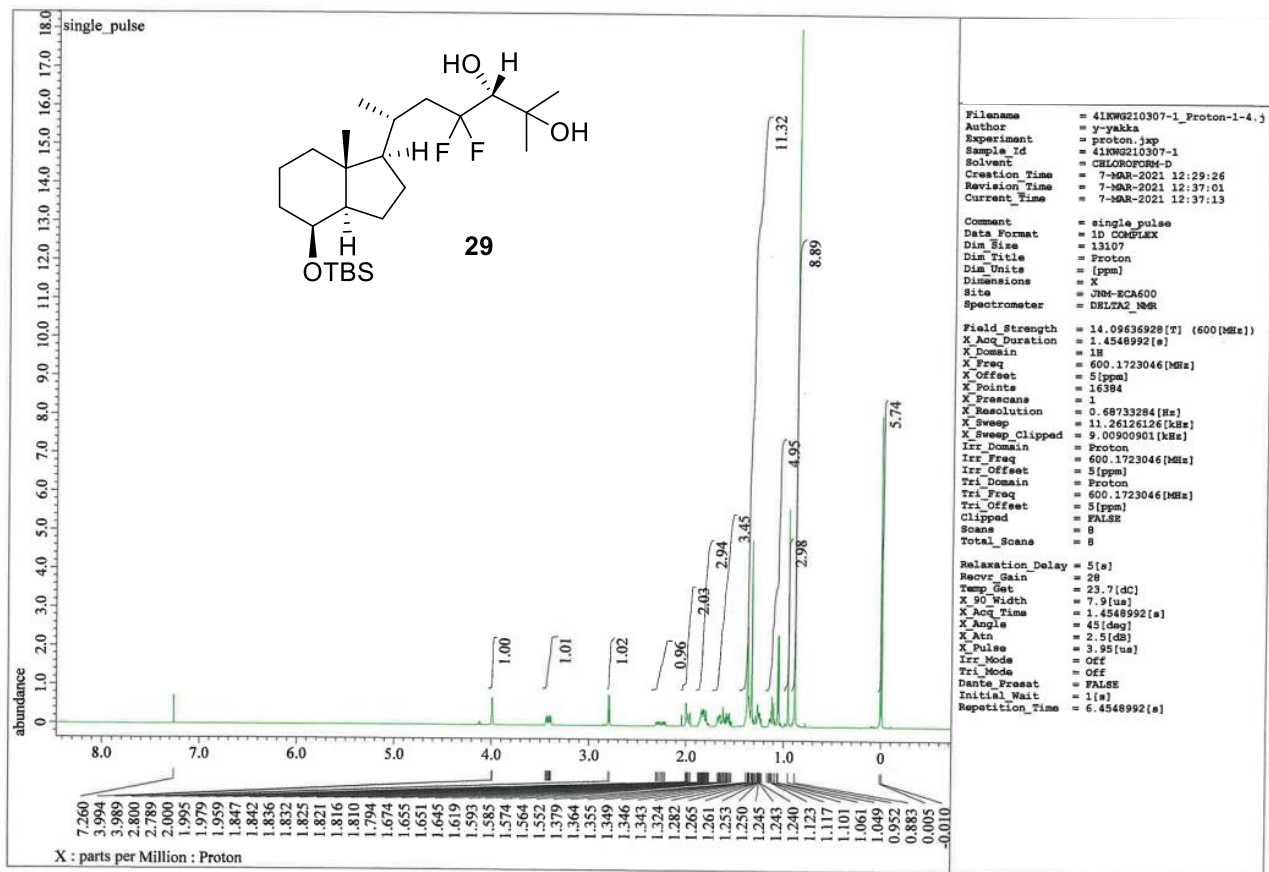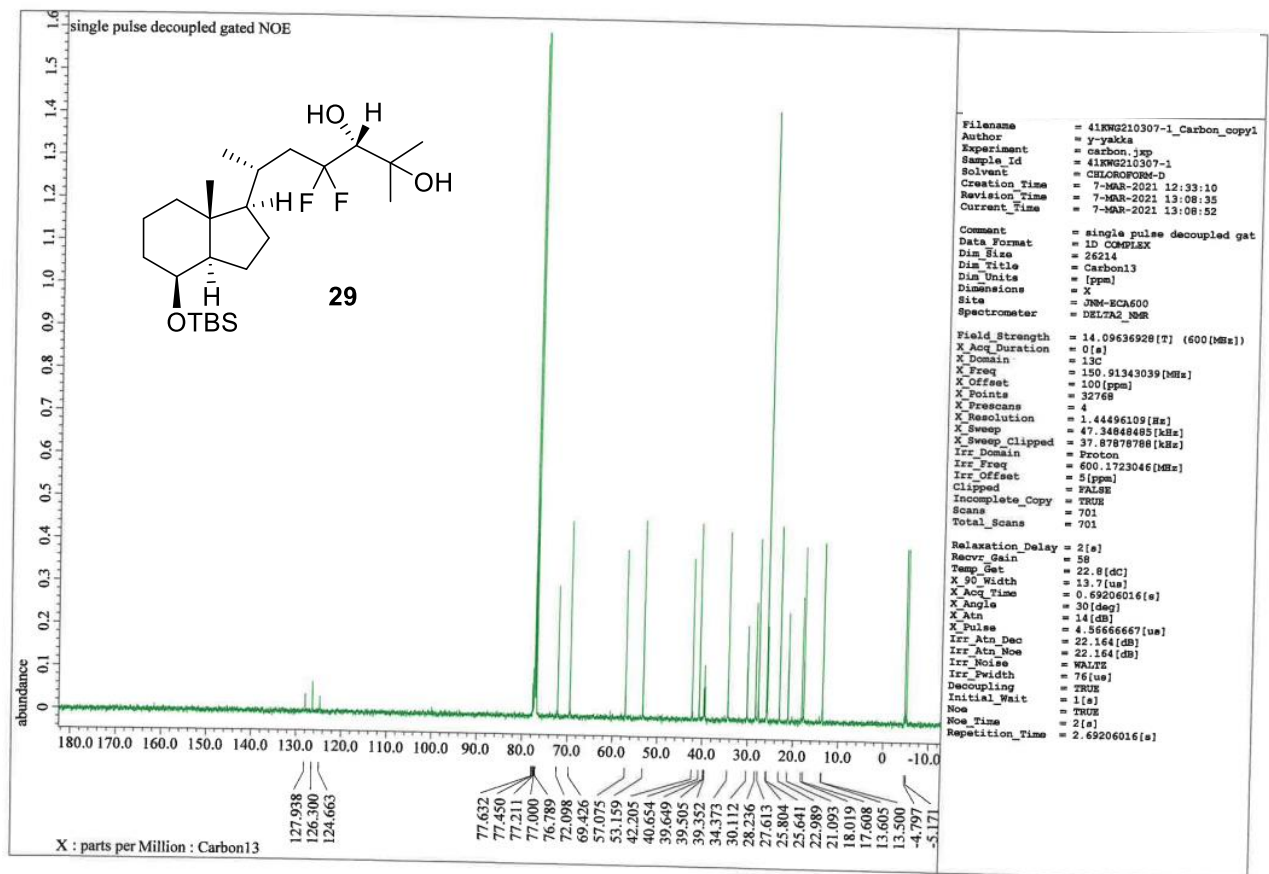



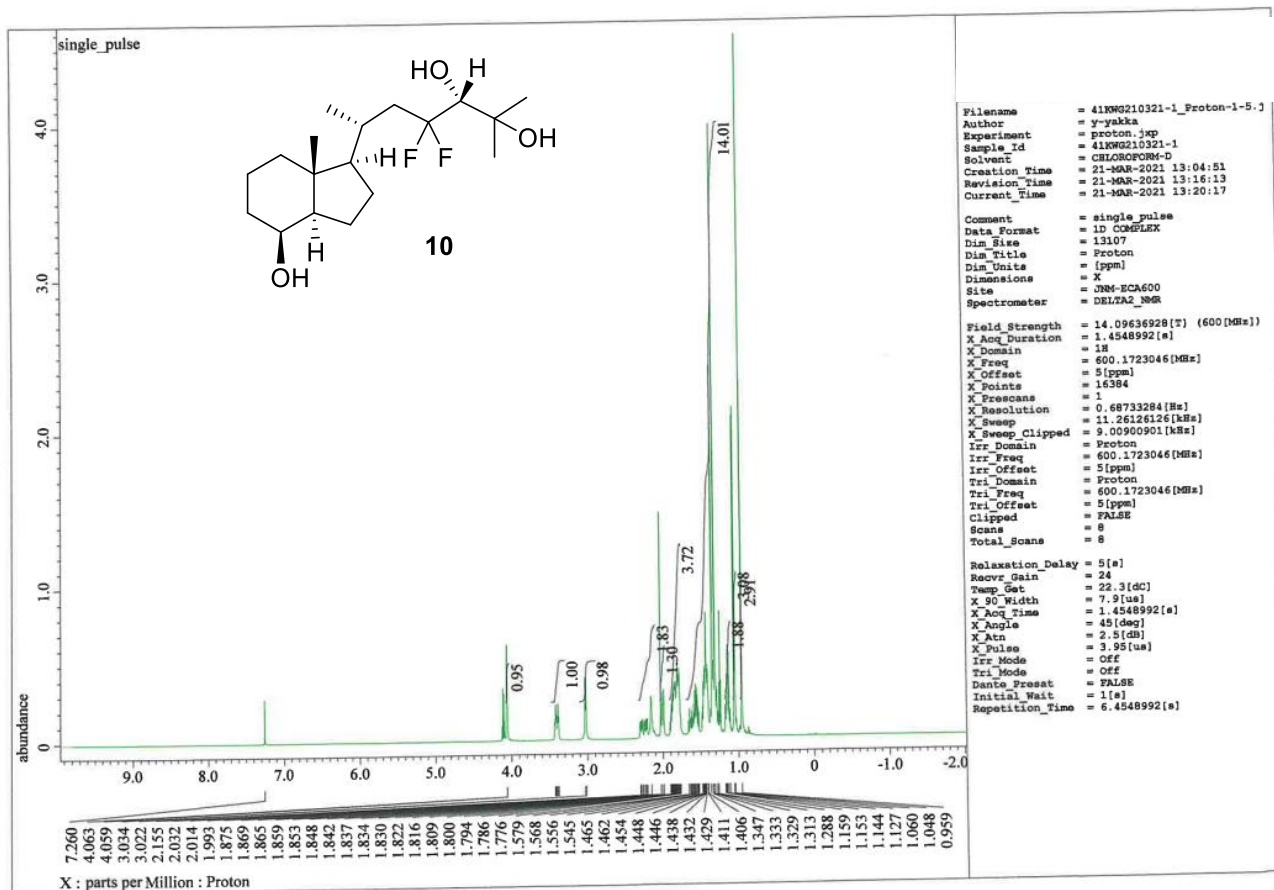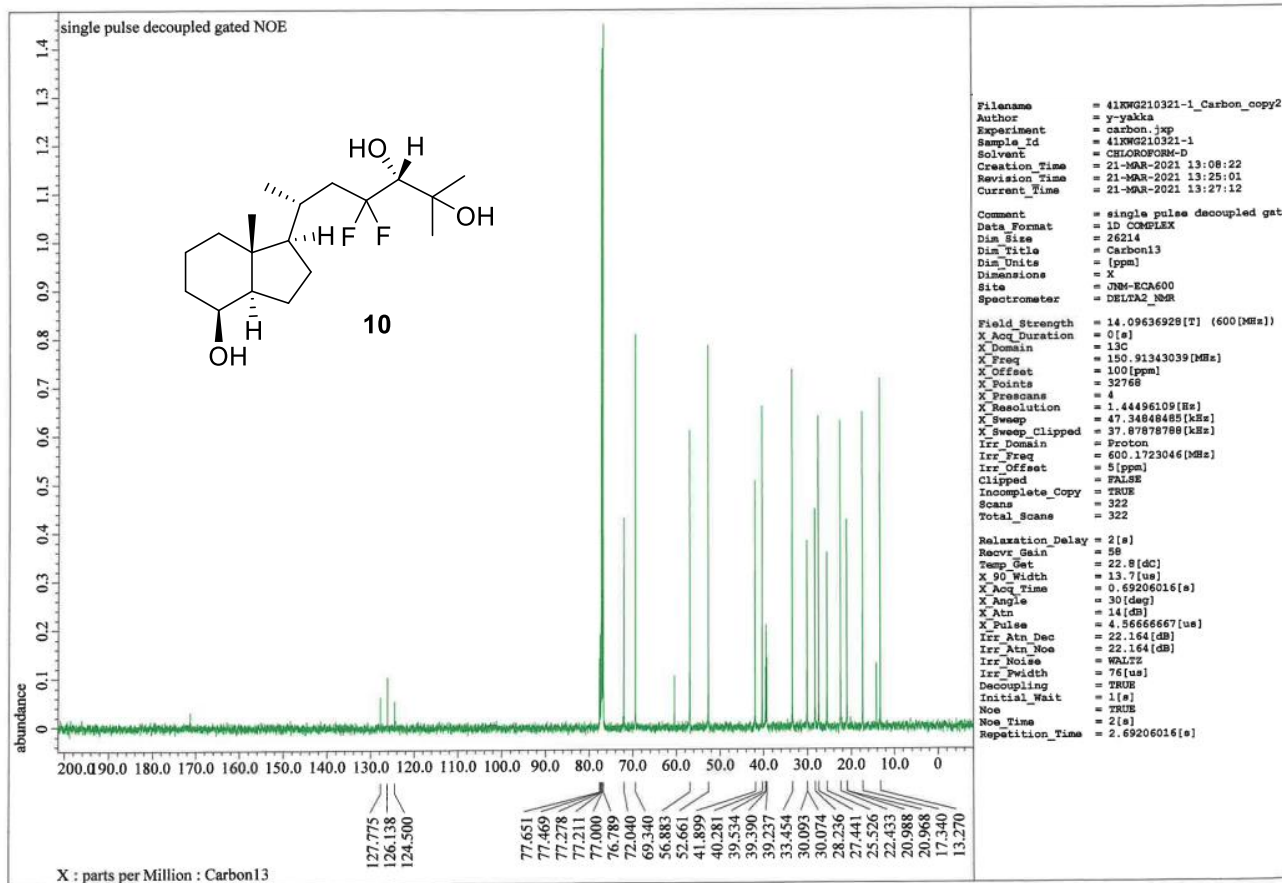

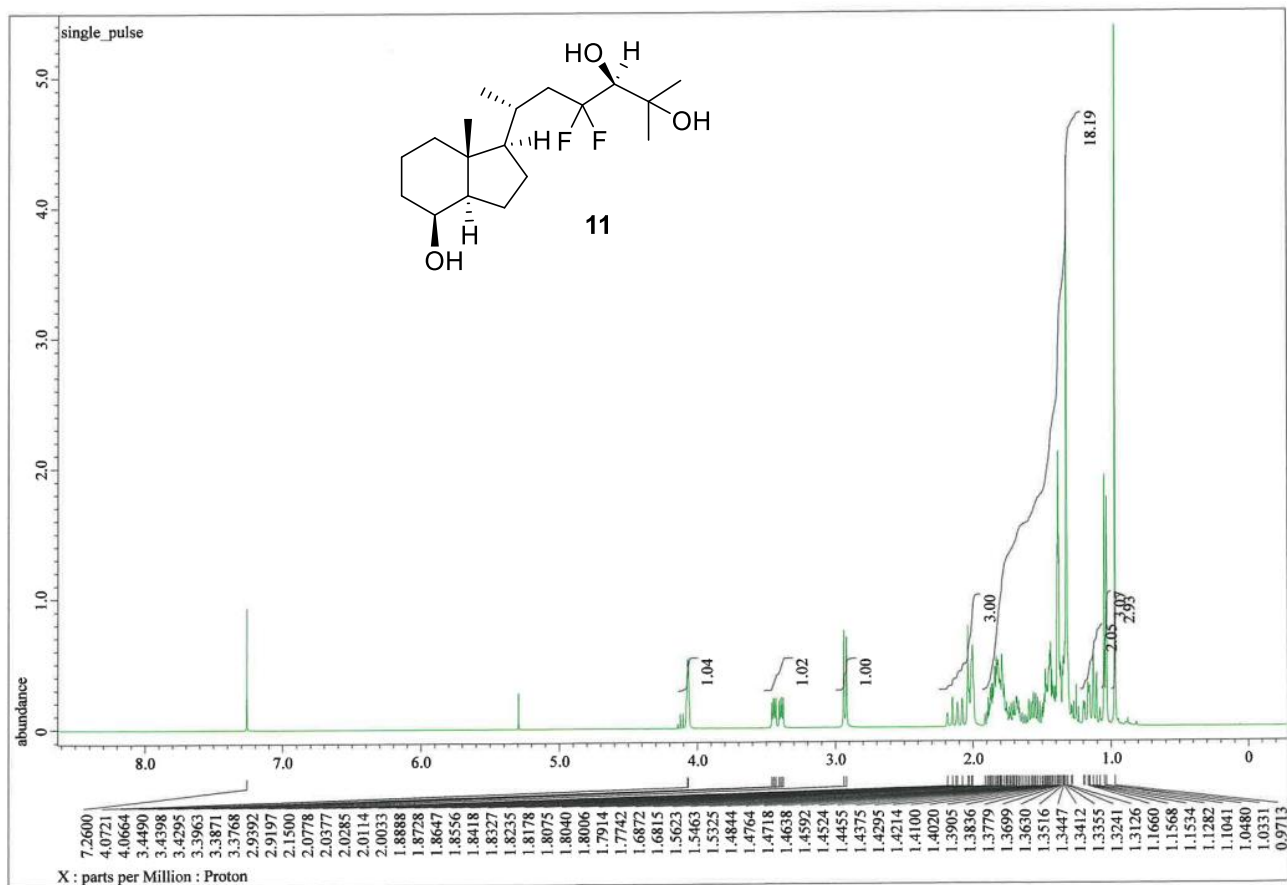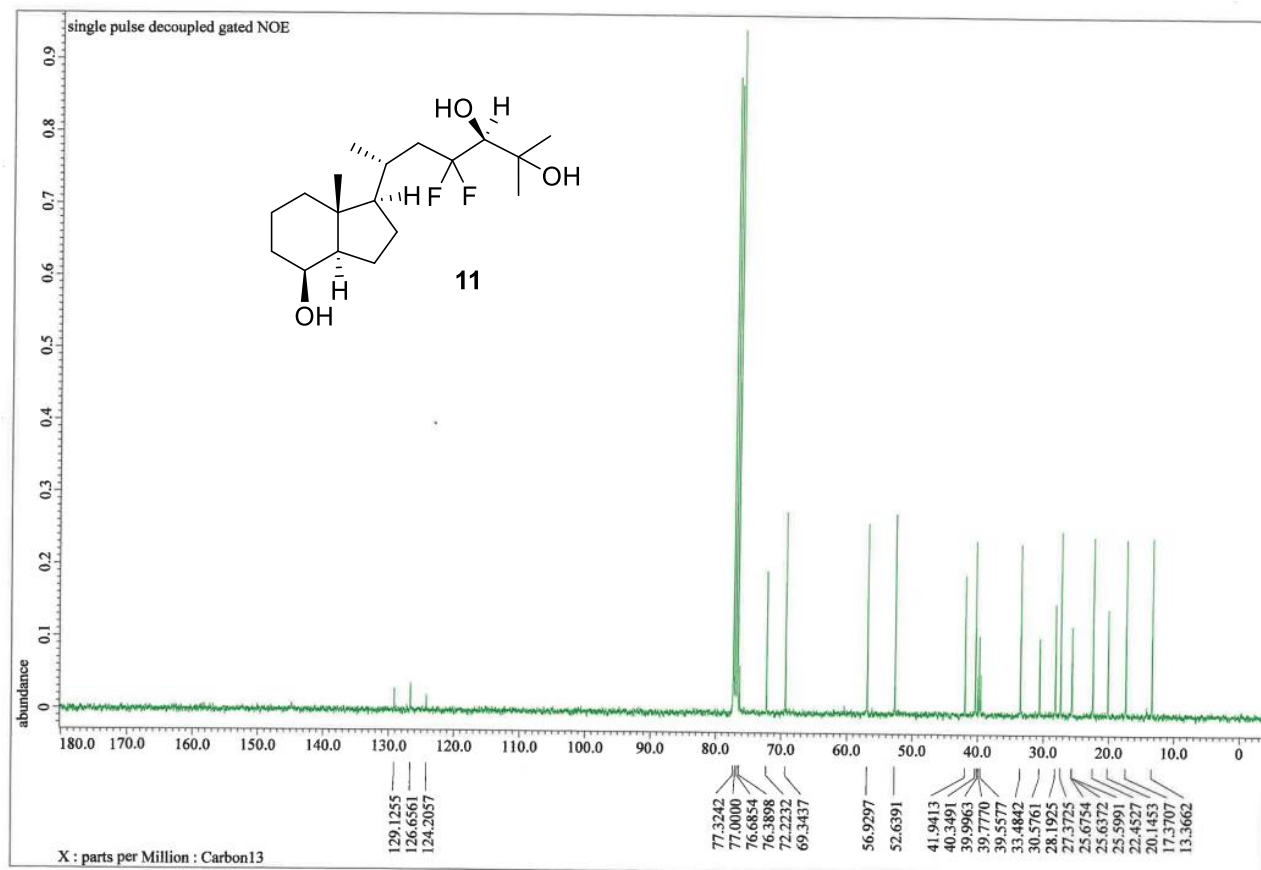



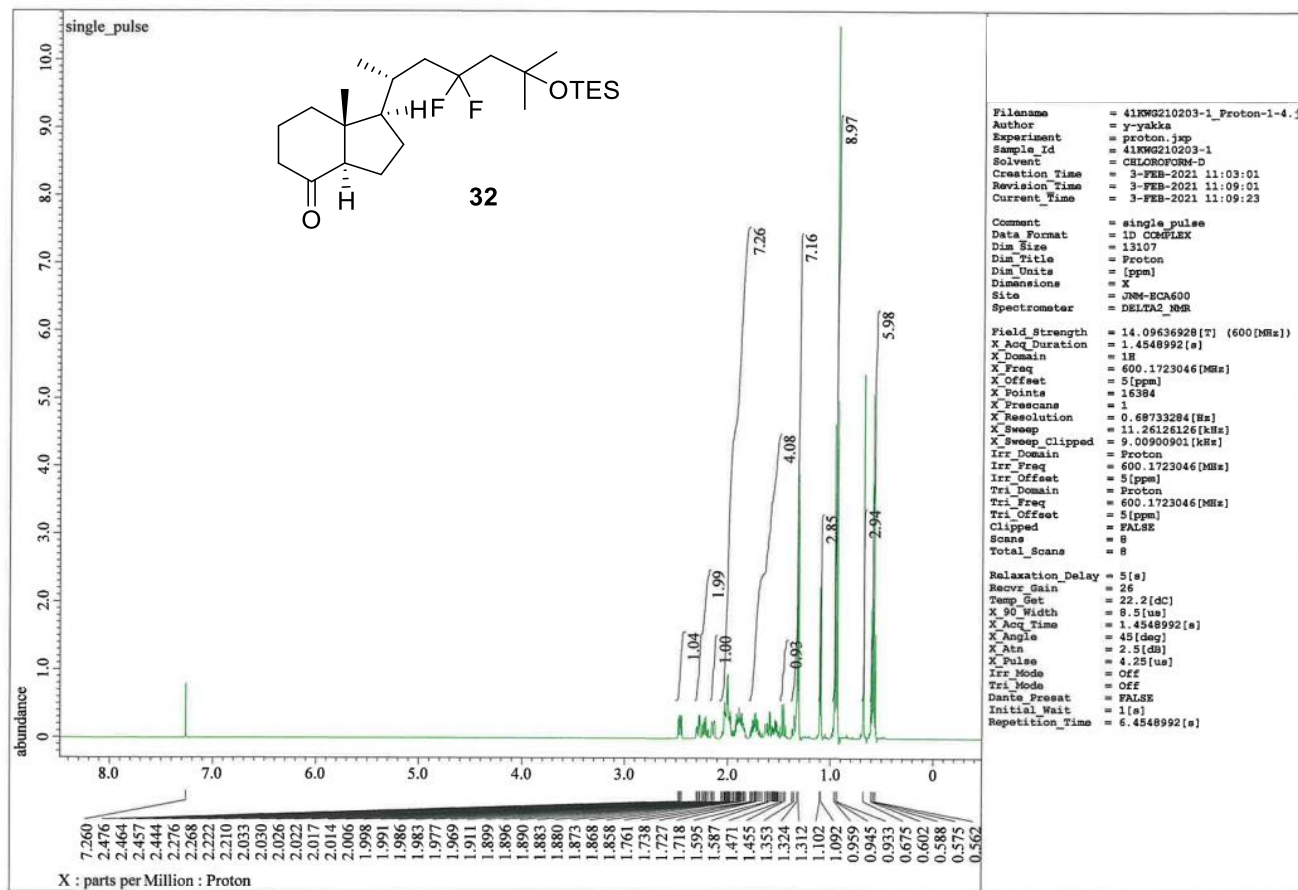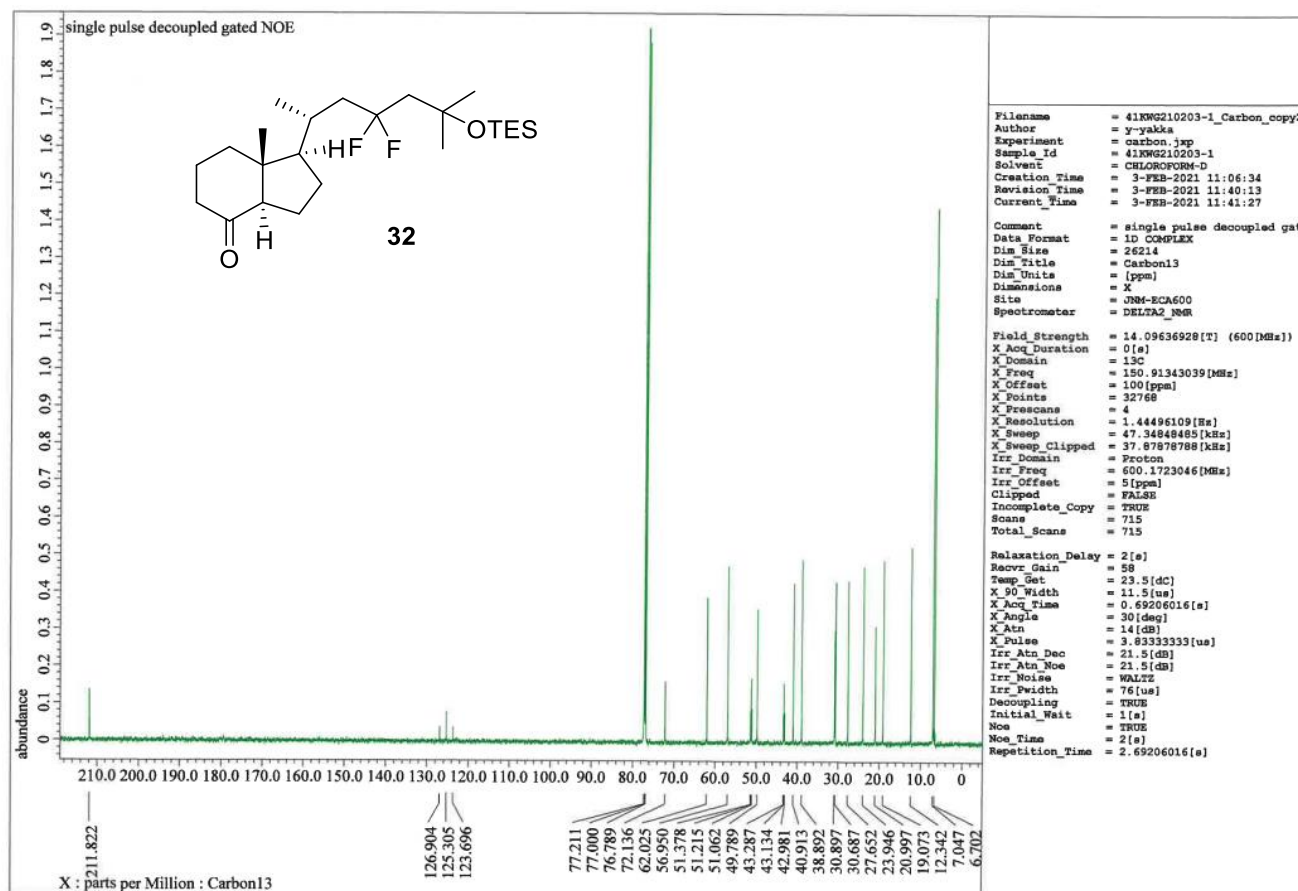



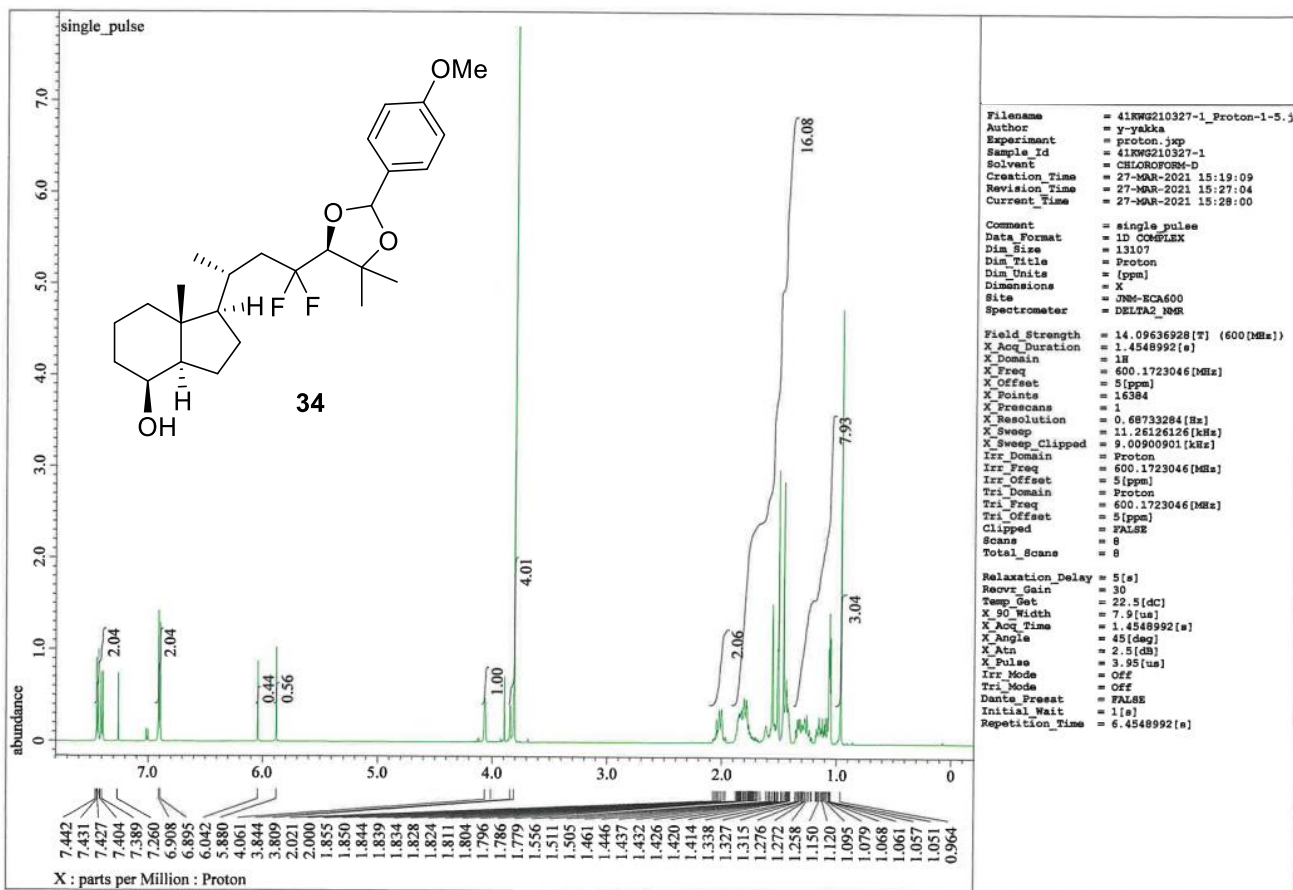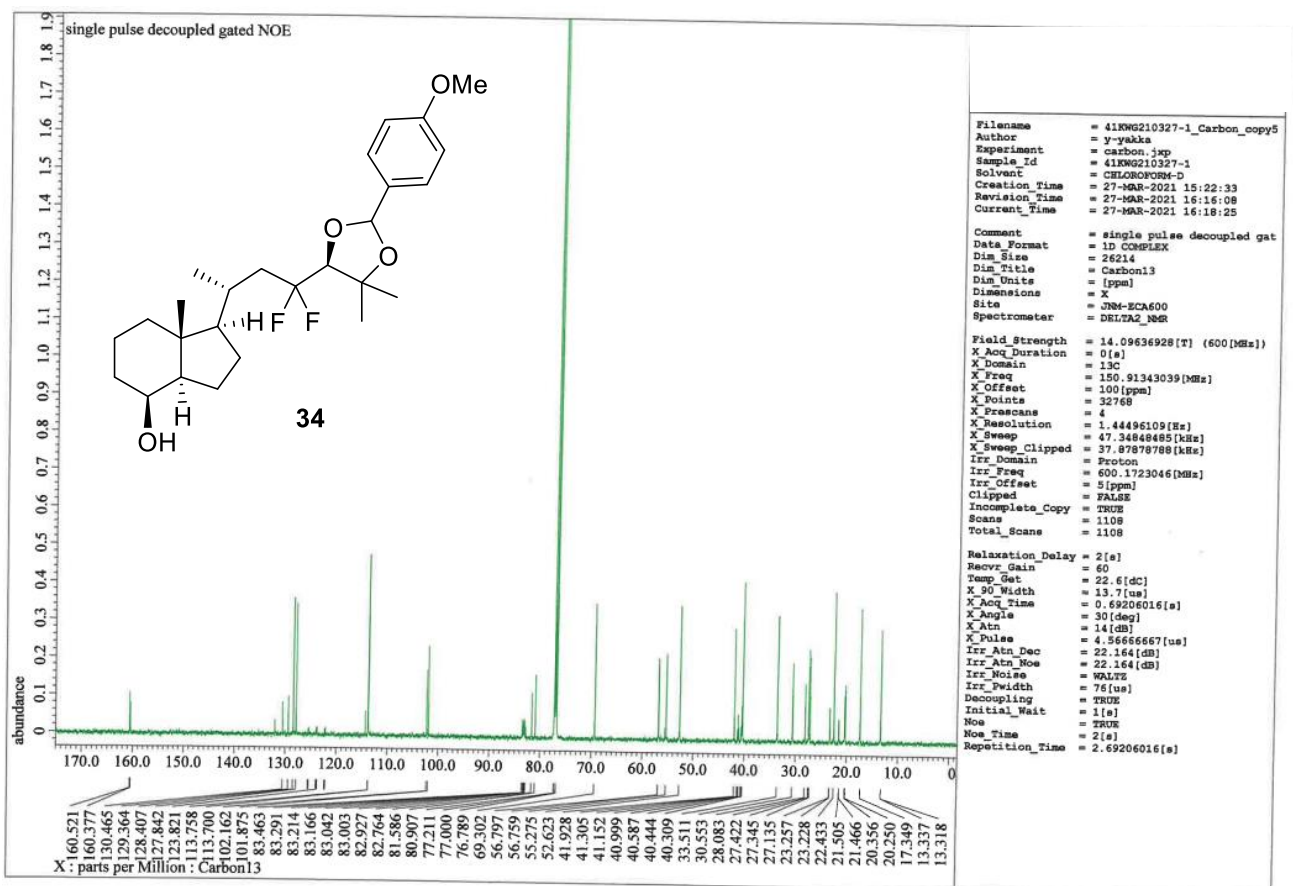



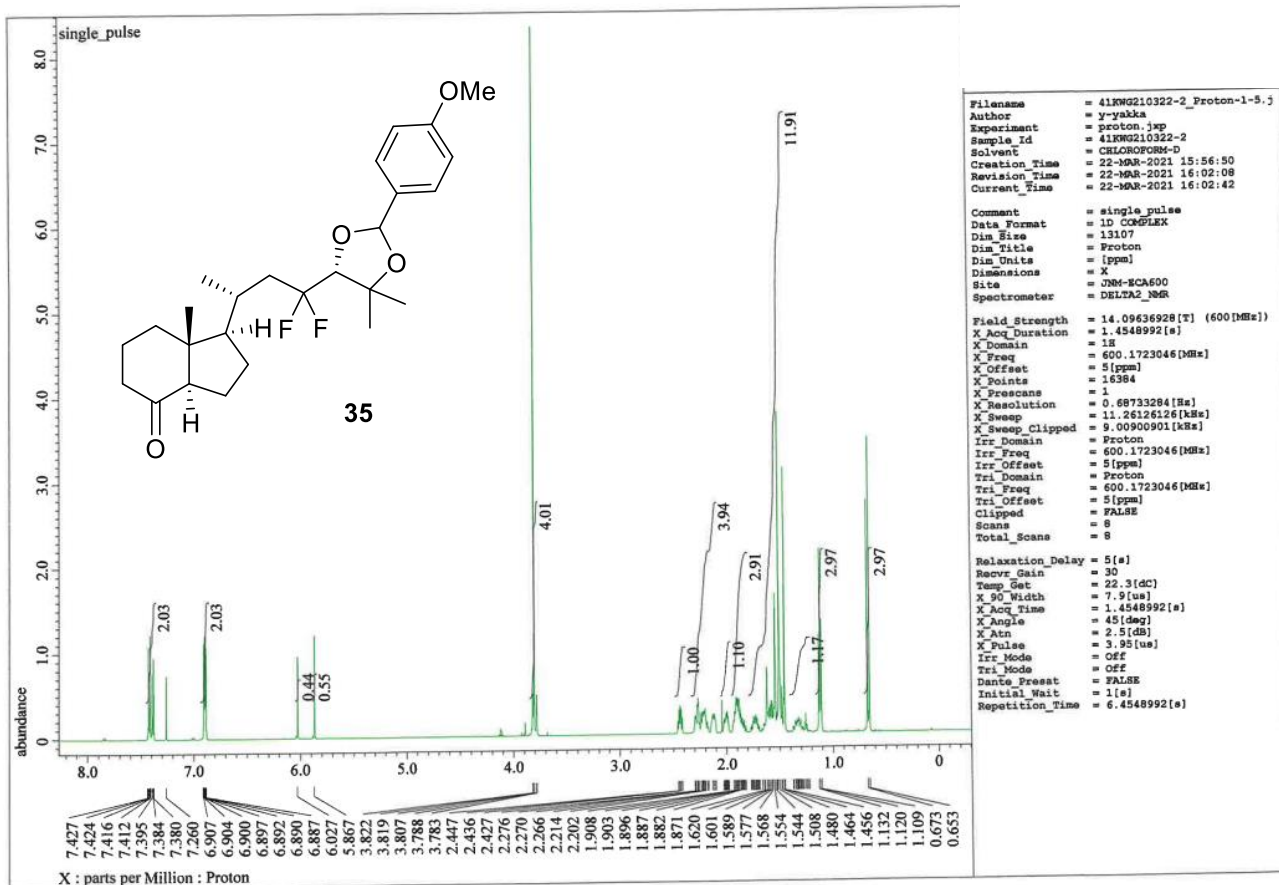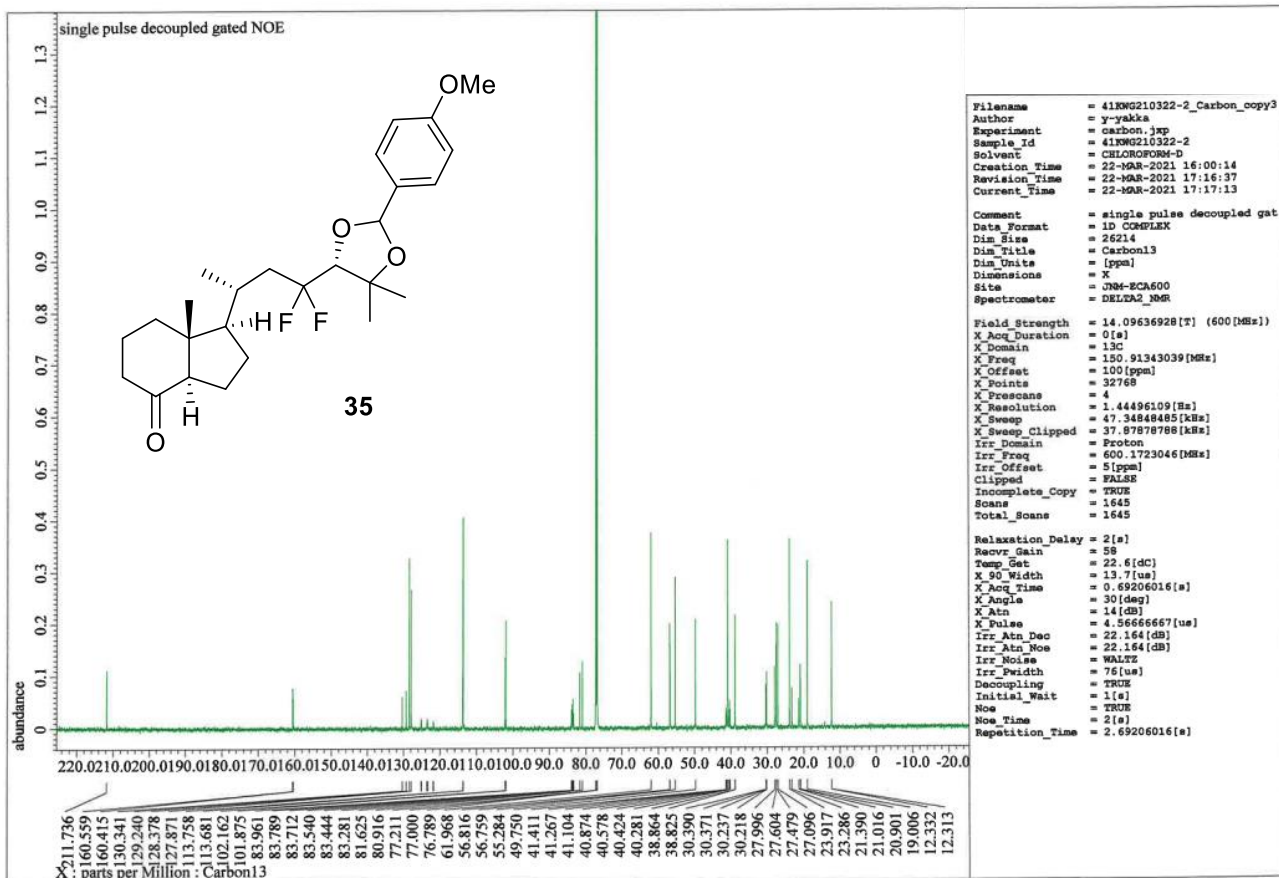



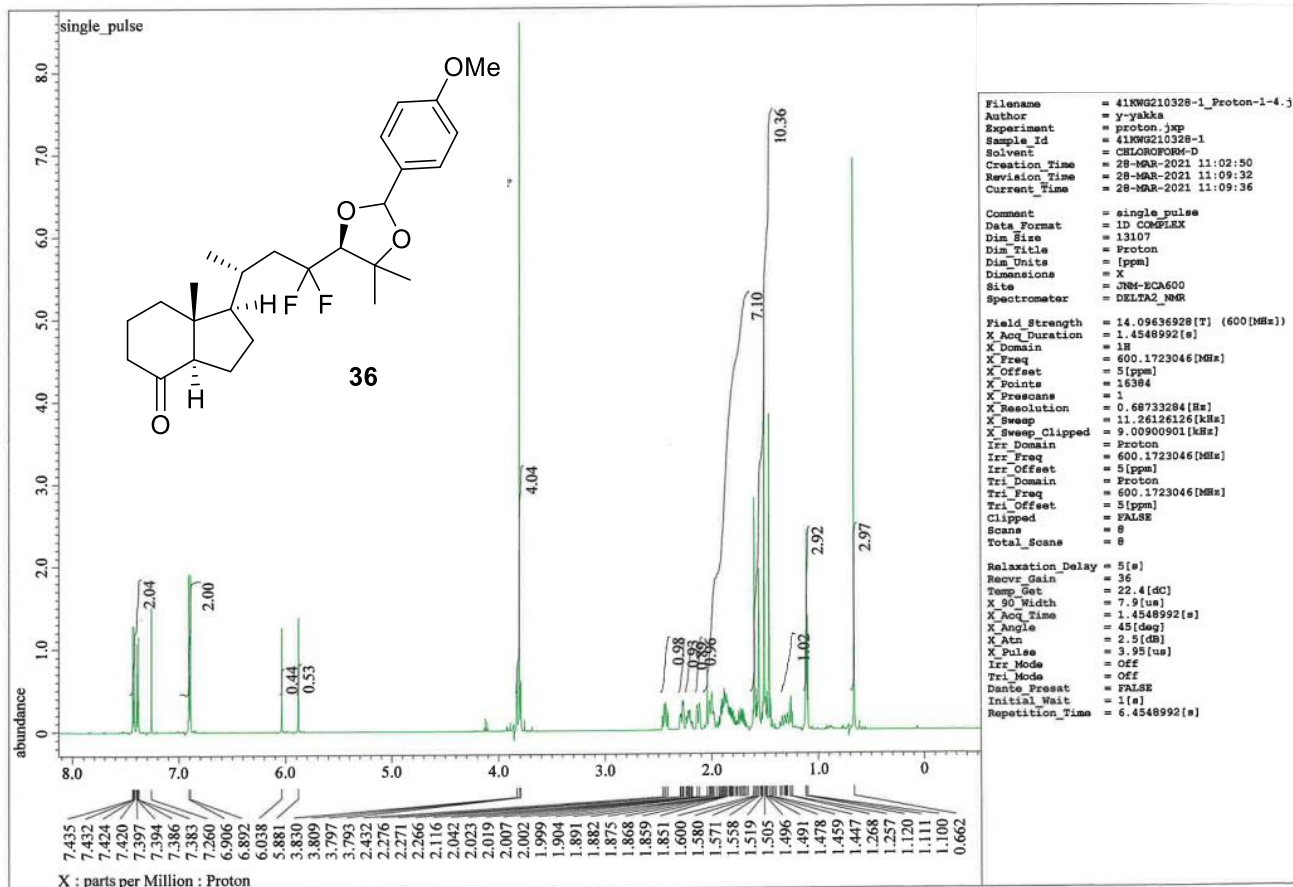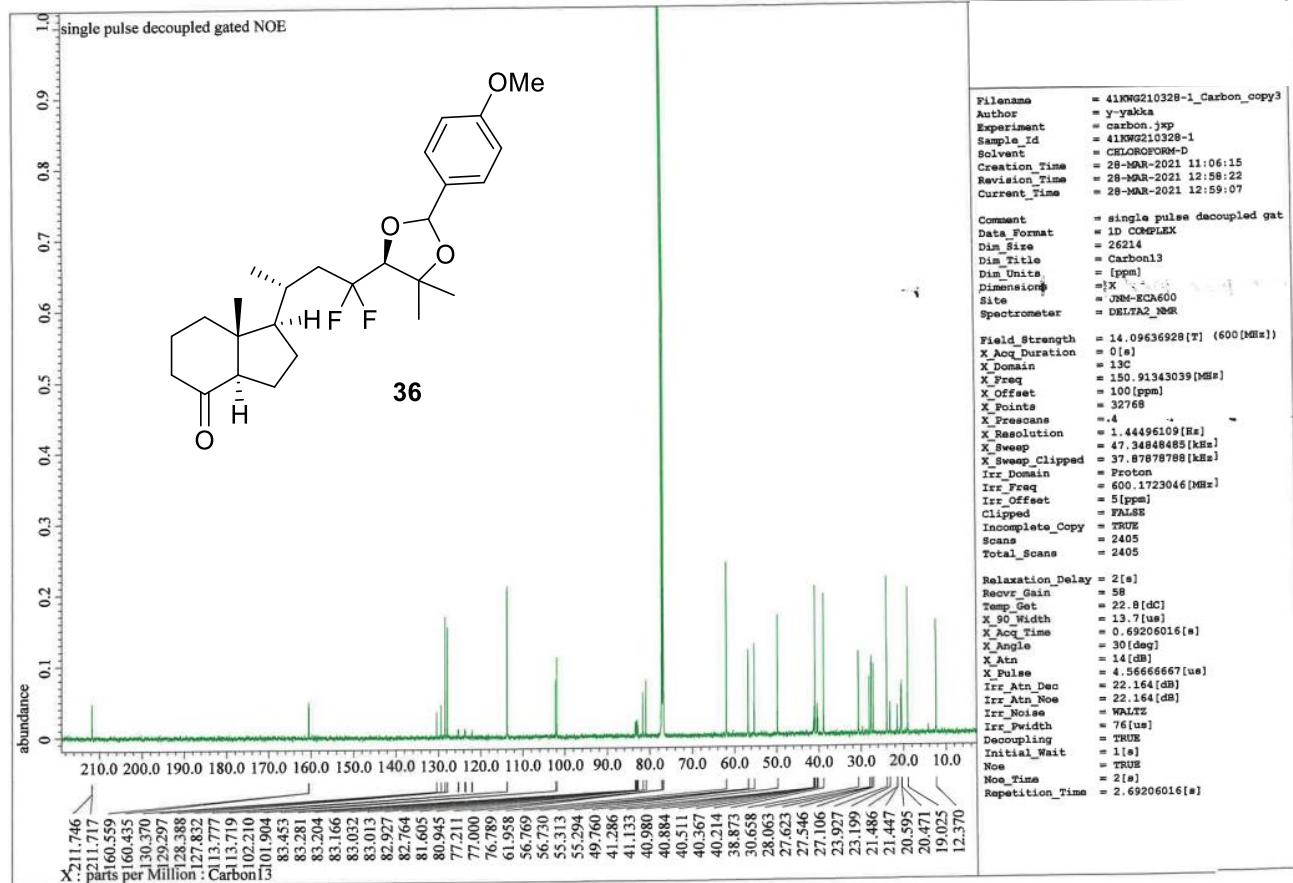

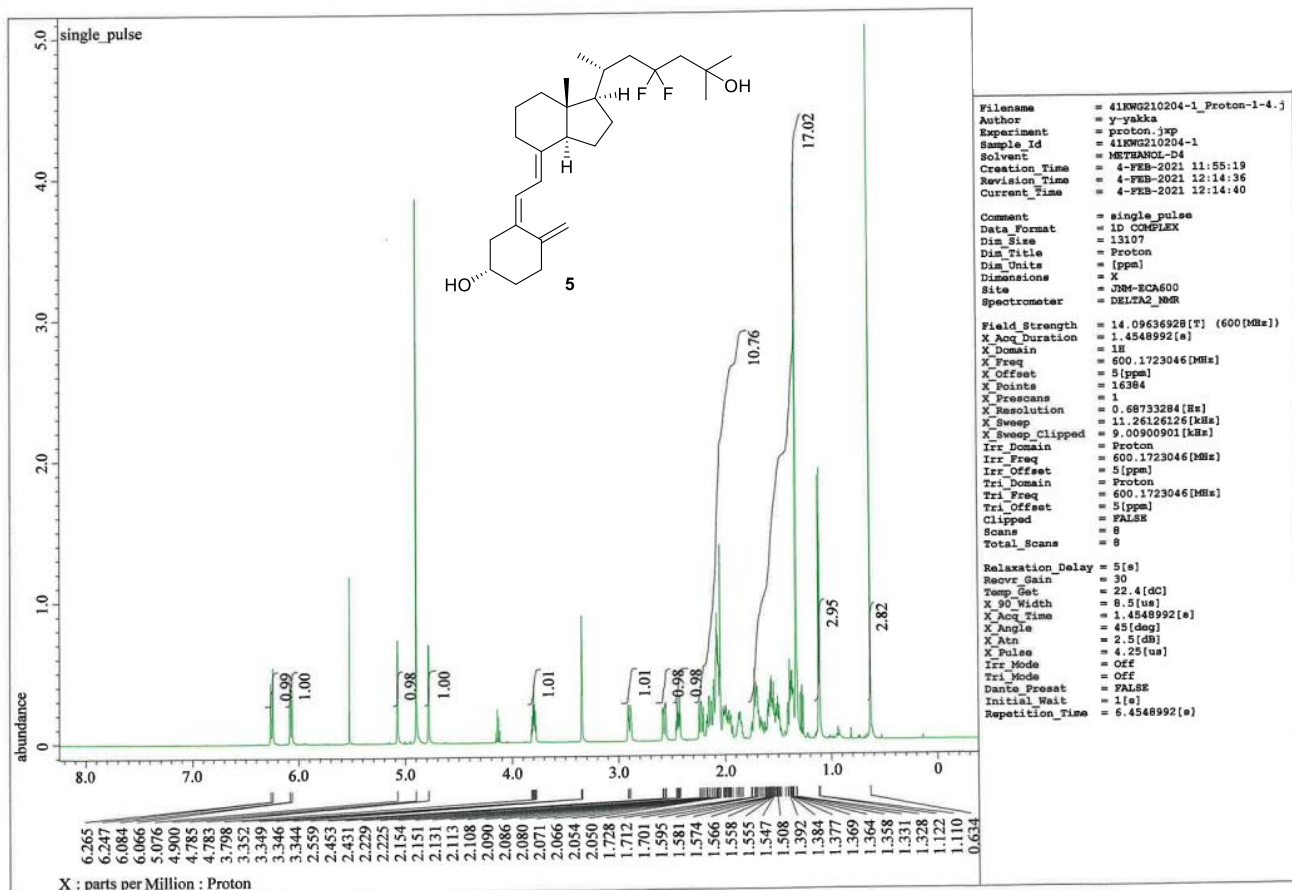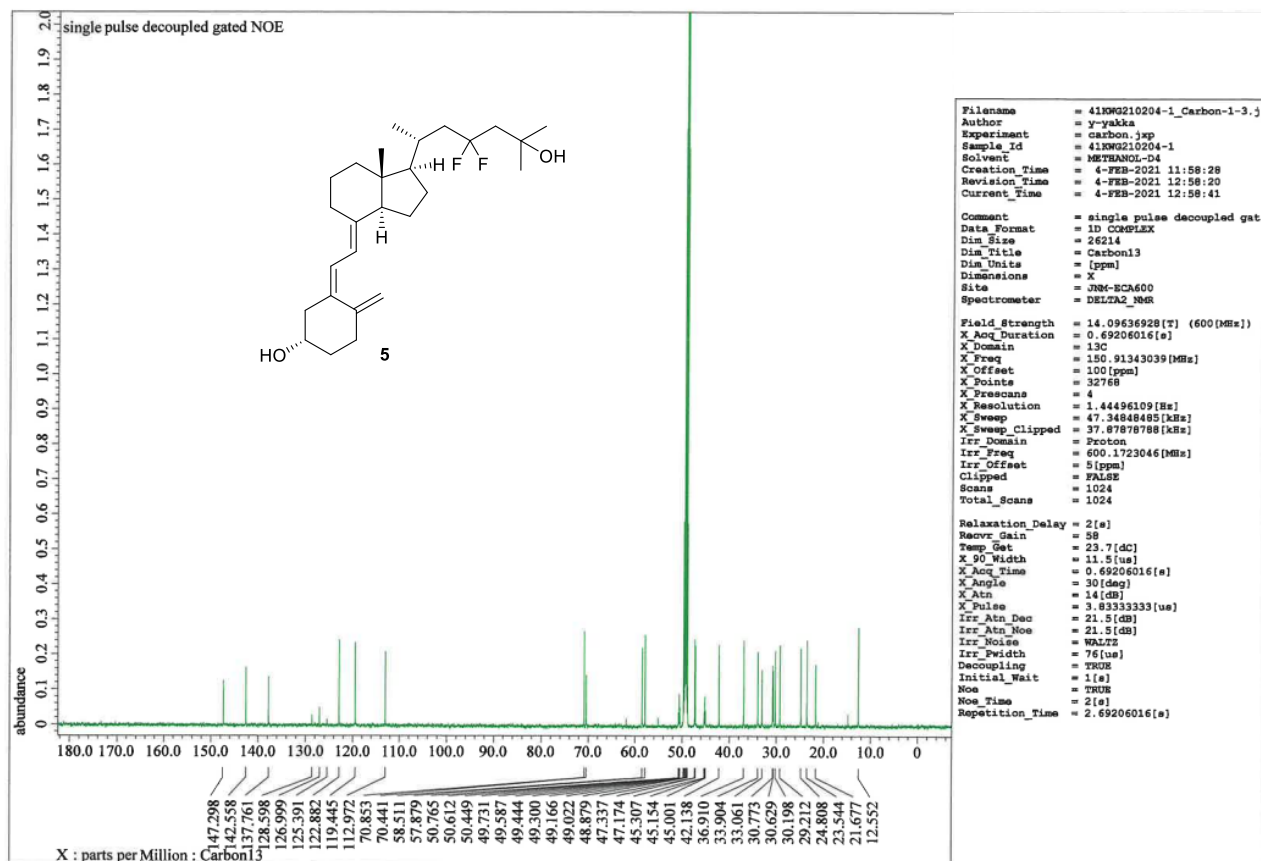

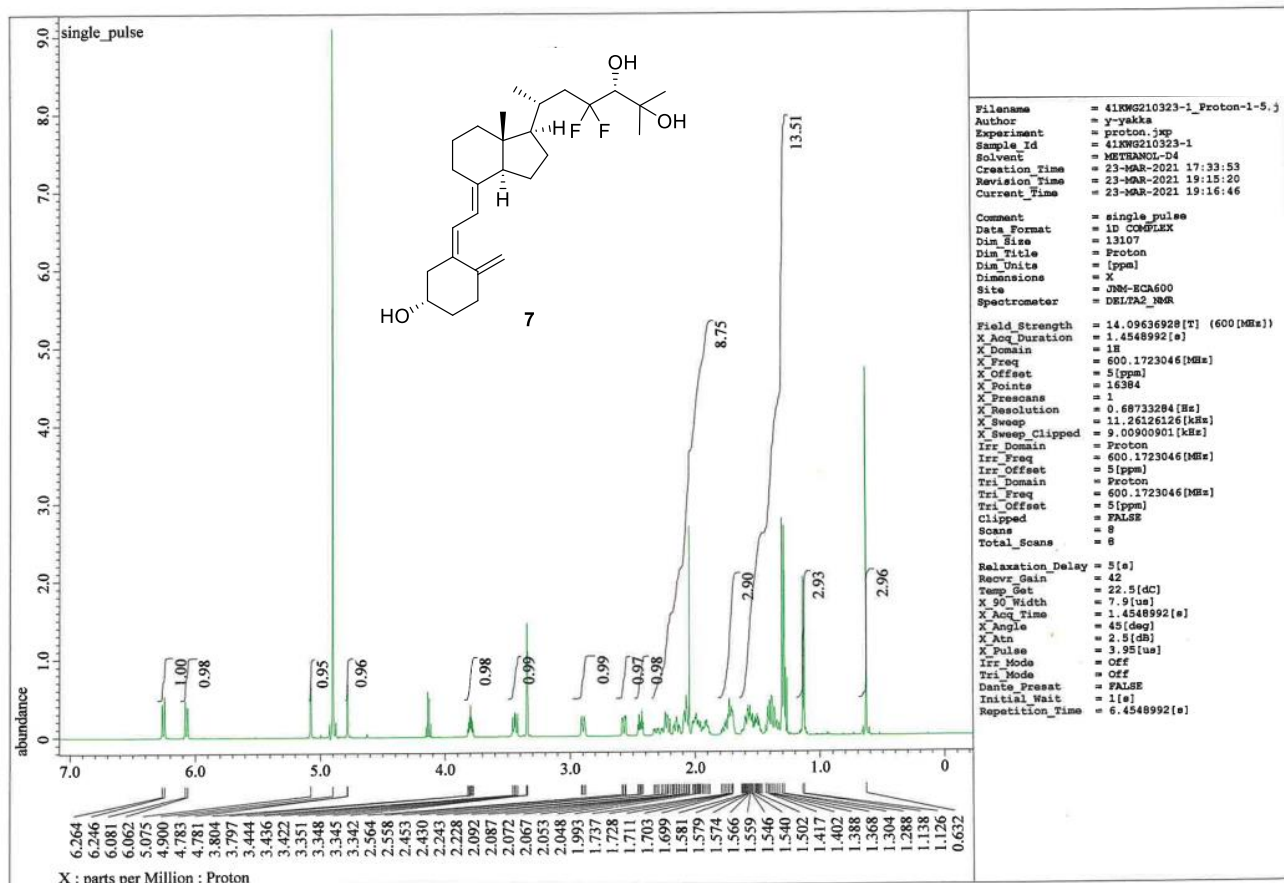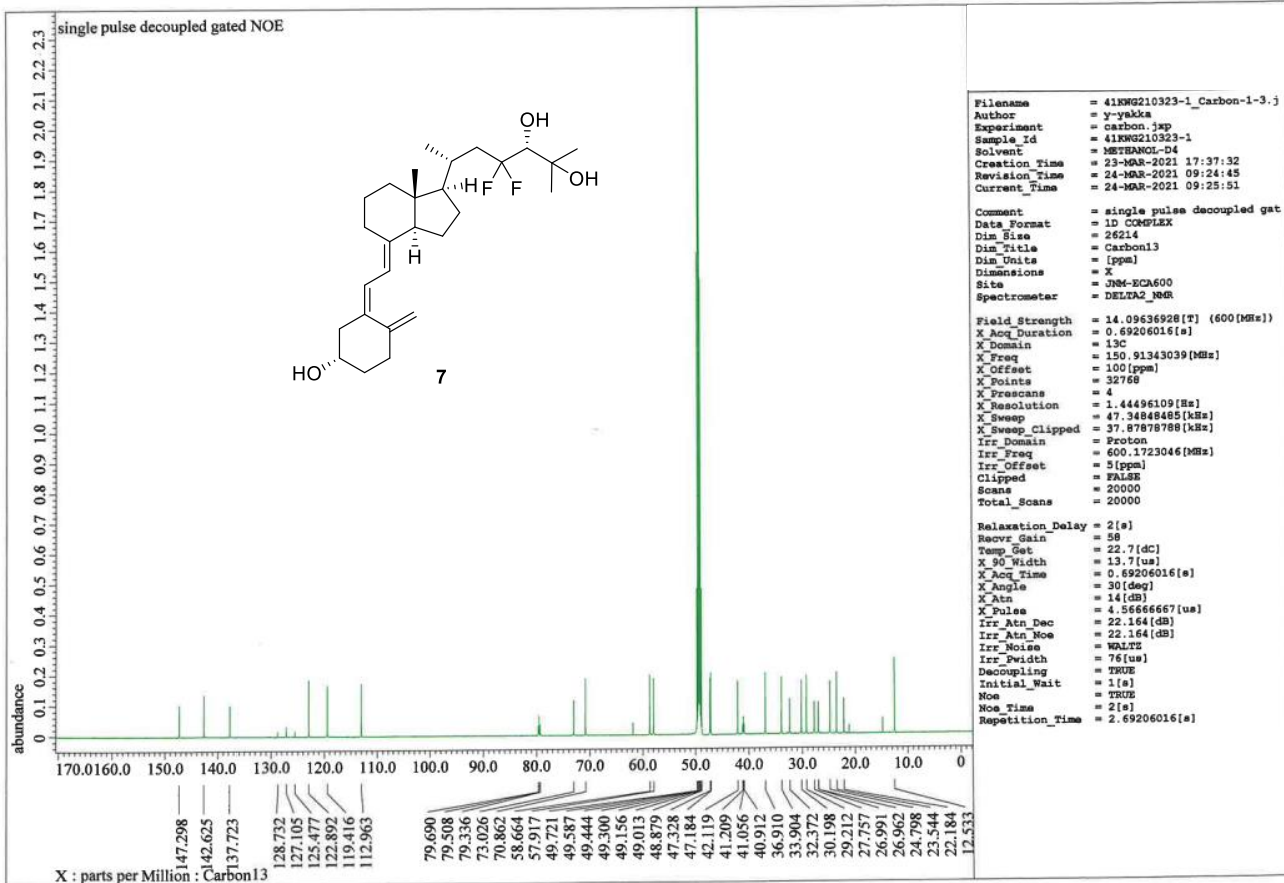



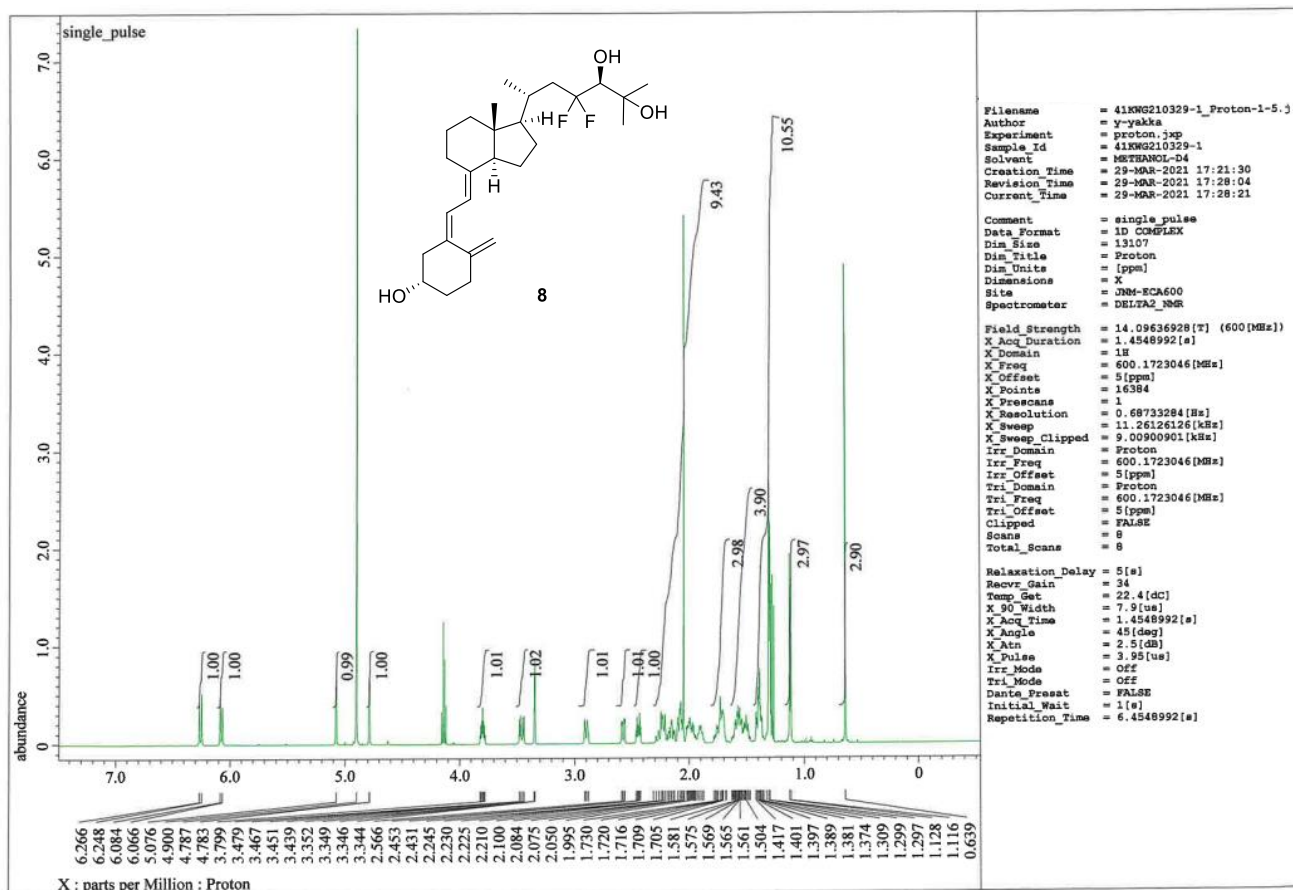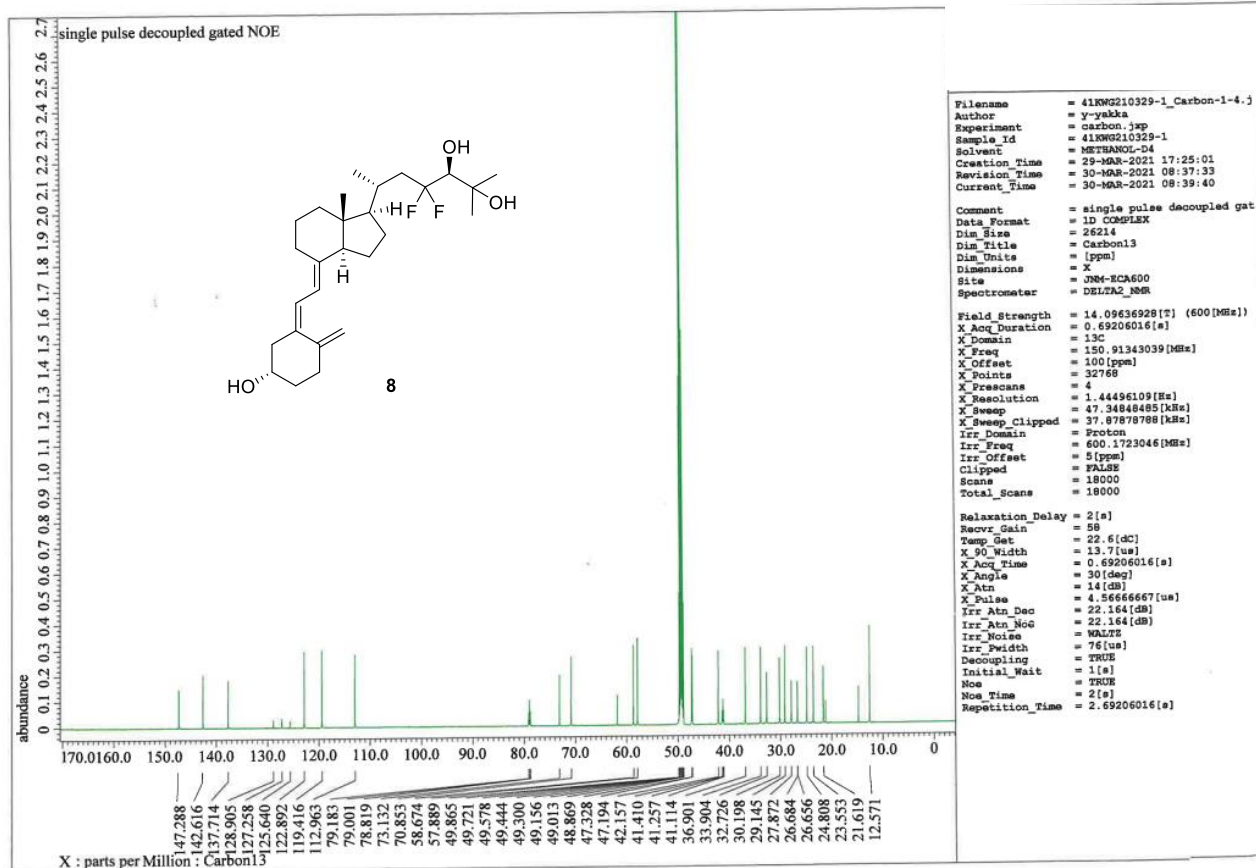



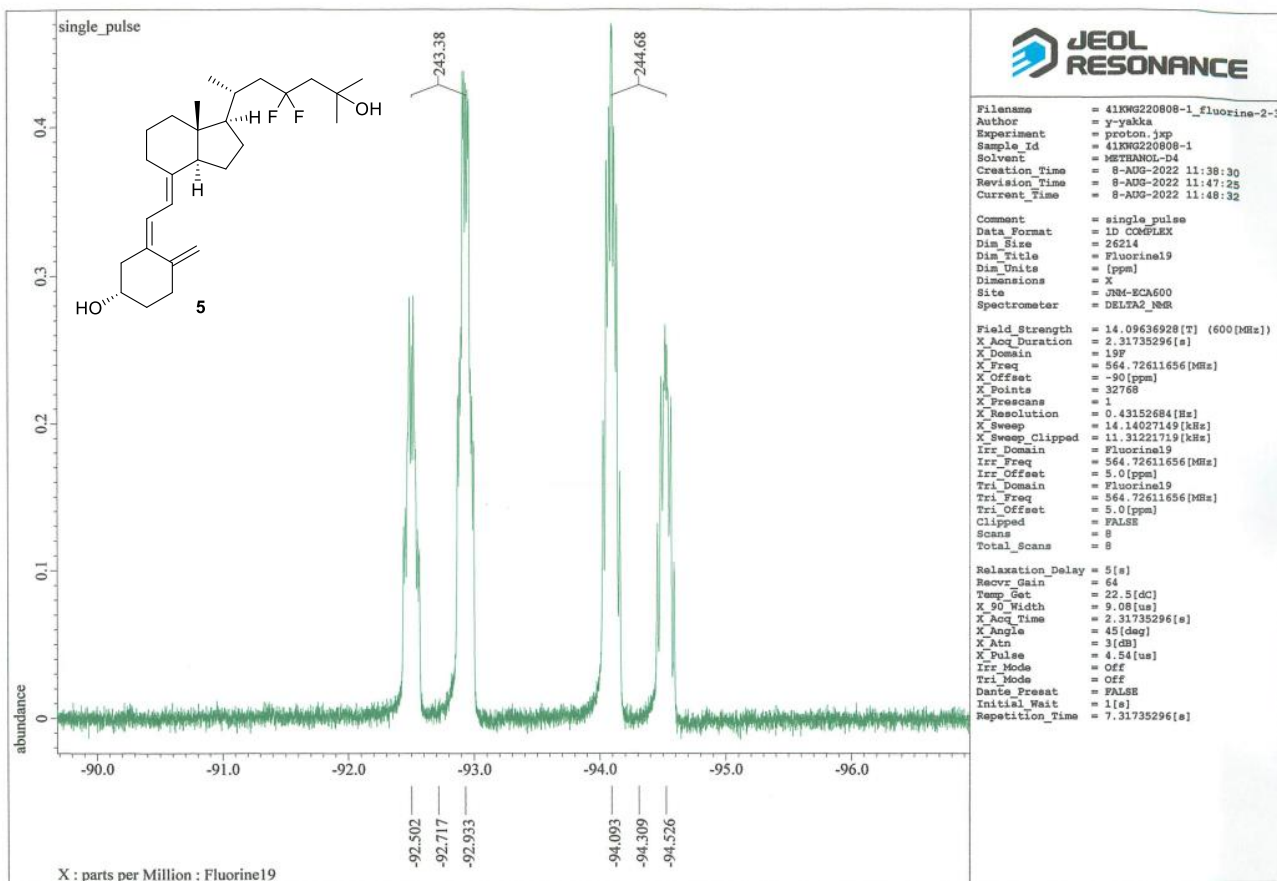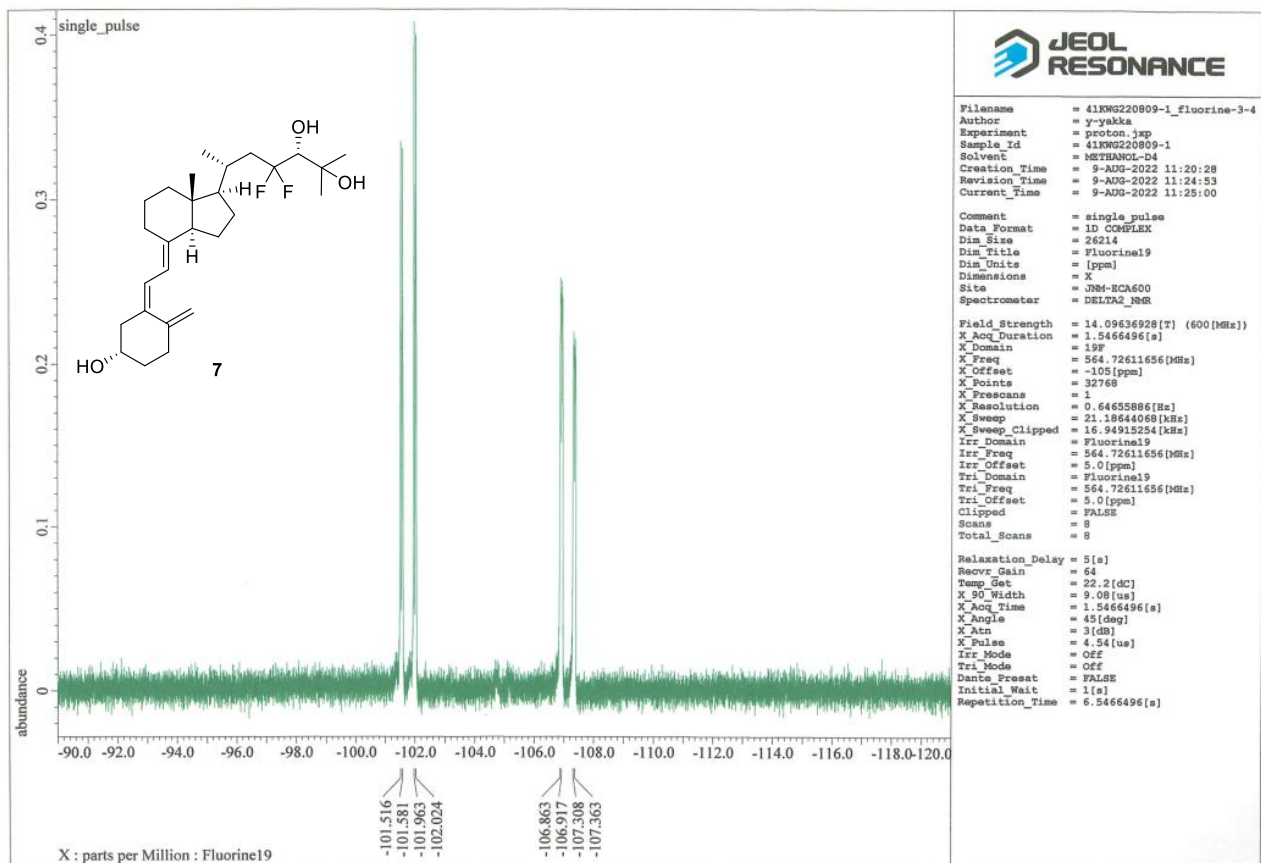

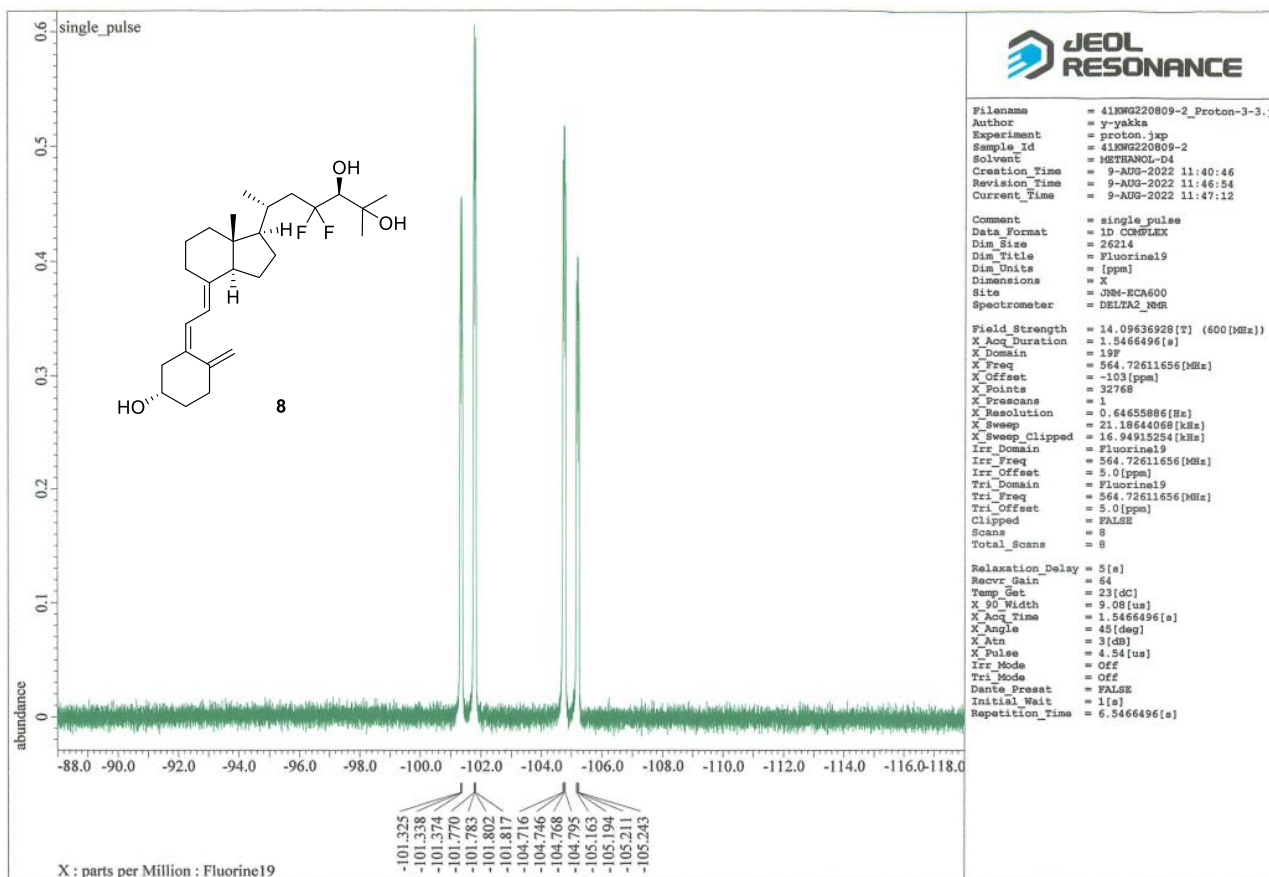

Supplement: s1 [file s1]
